# Supplementary material for: Comprehensive phenotypic characterization of an allelic series of zebrafish models of NEB-related nemaline myopathy
Source: PubMed Central journal article supplement (PMC11153343; doi:10.1093/hmg/ddae033), 2024-03-17
Supplement: fabian_et_al_supplemental_material_accepted_ddae033.pdf [file fabian_et_al_supplemental_material_accepted_ddae033.pdf]

# Supplementary Figure 1

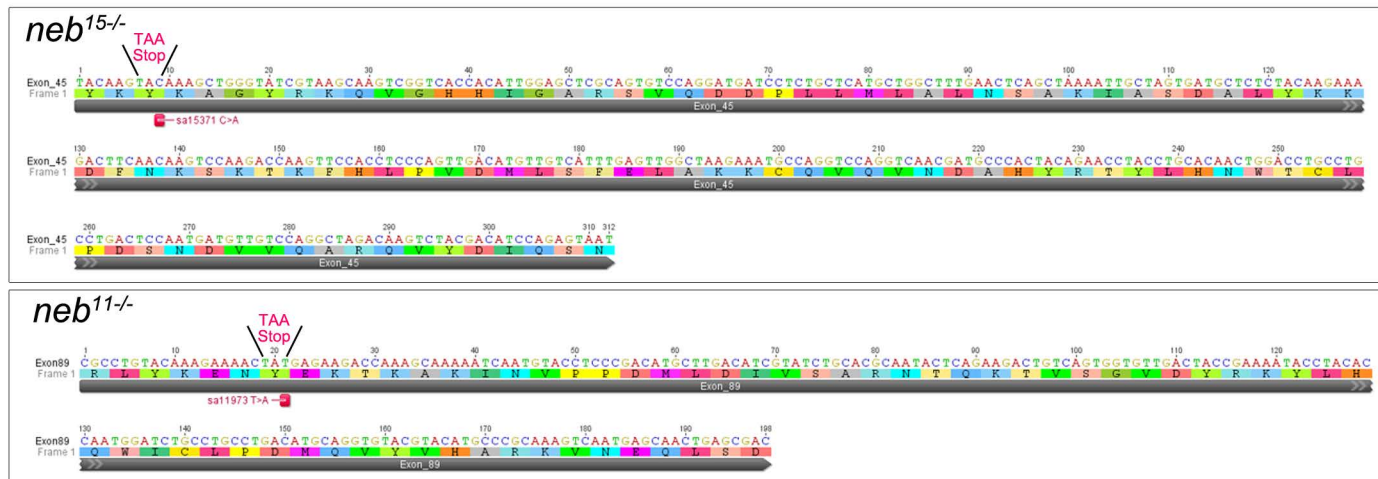

# Supplementary Figure 2

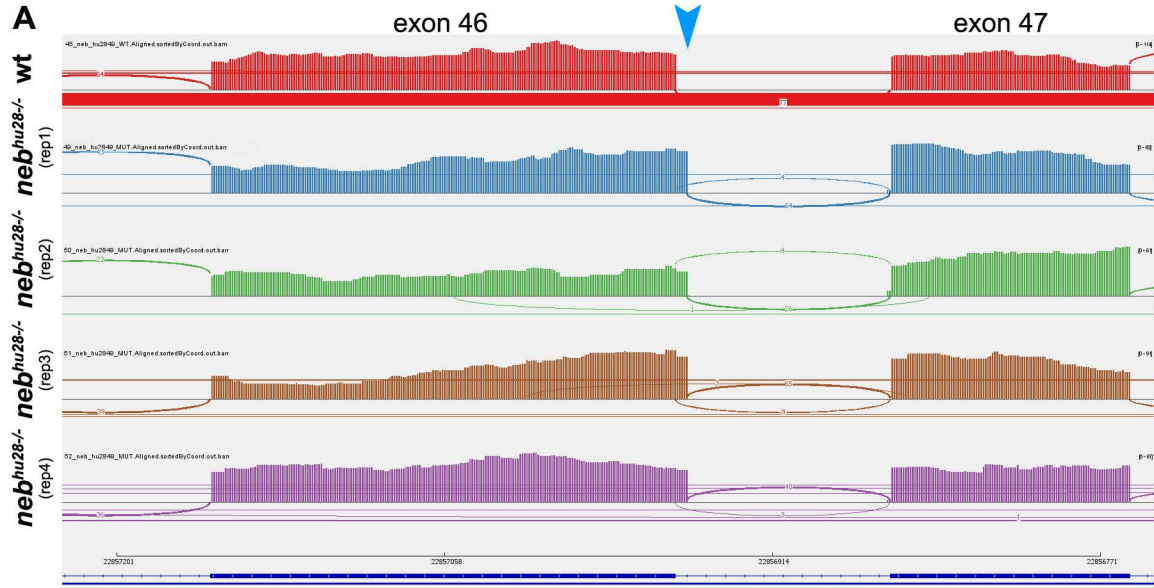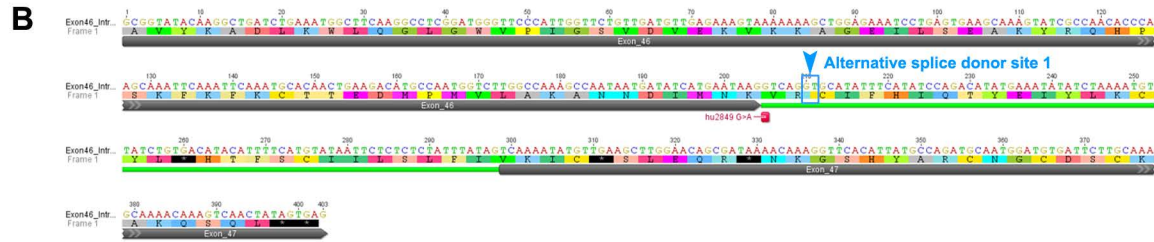





# Supplementary Figure 5

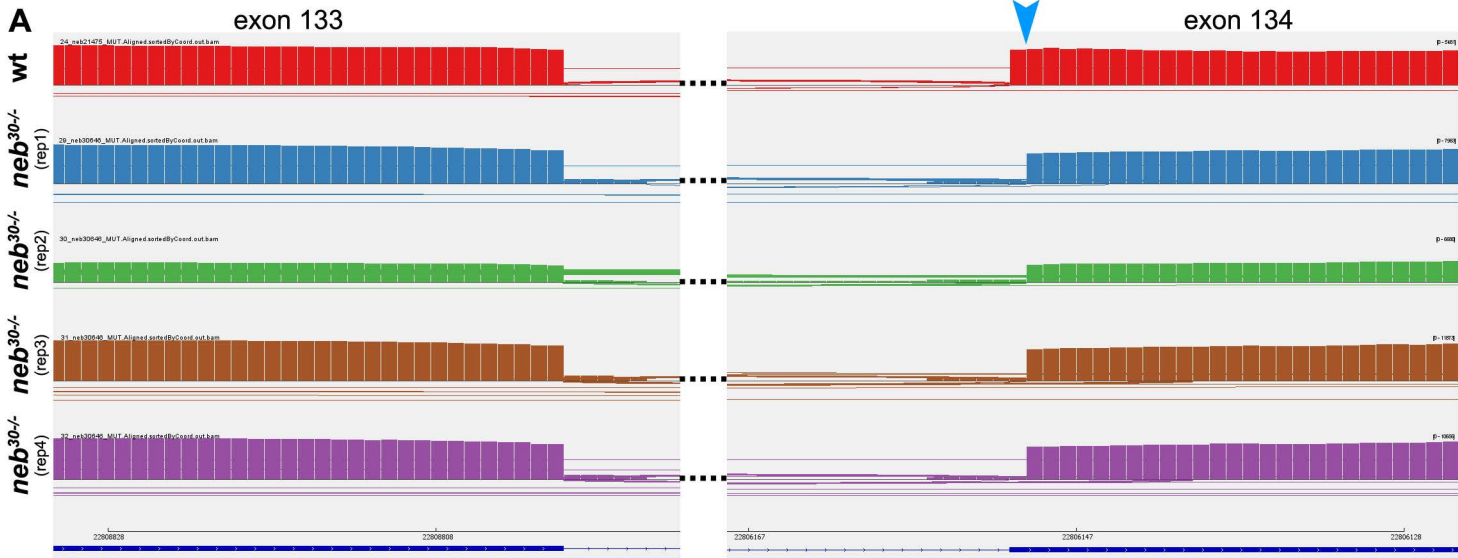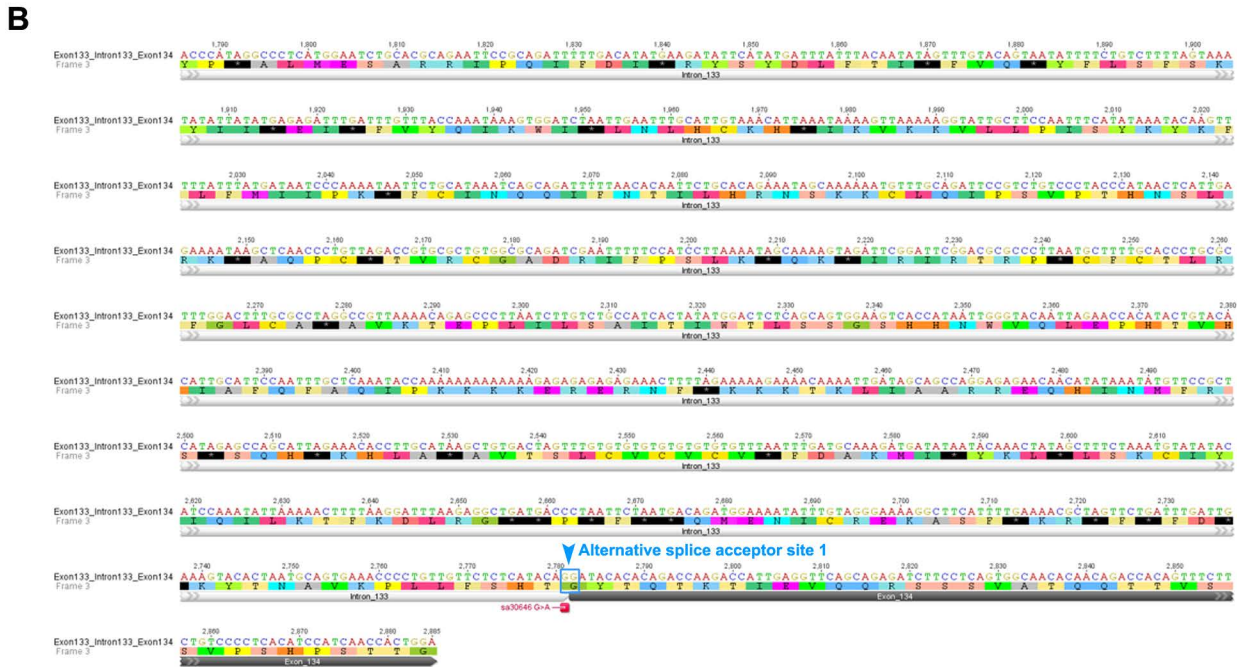

Suppl Fig 6. kinetics @ optimal length

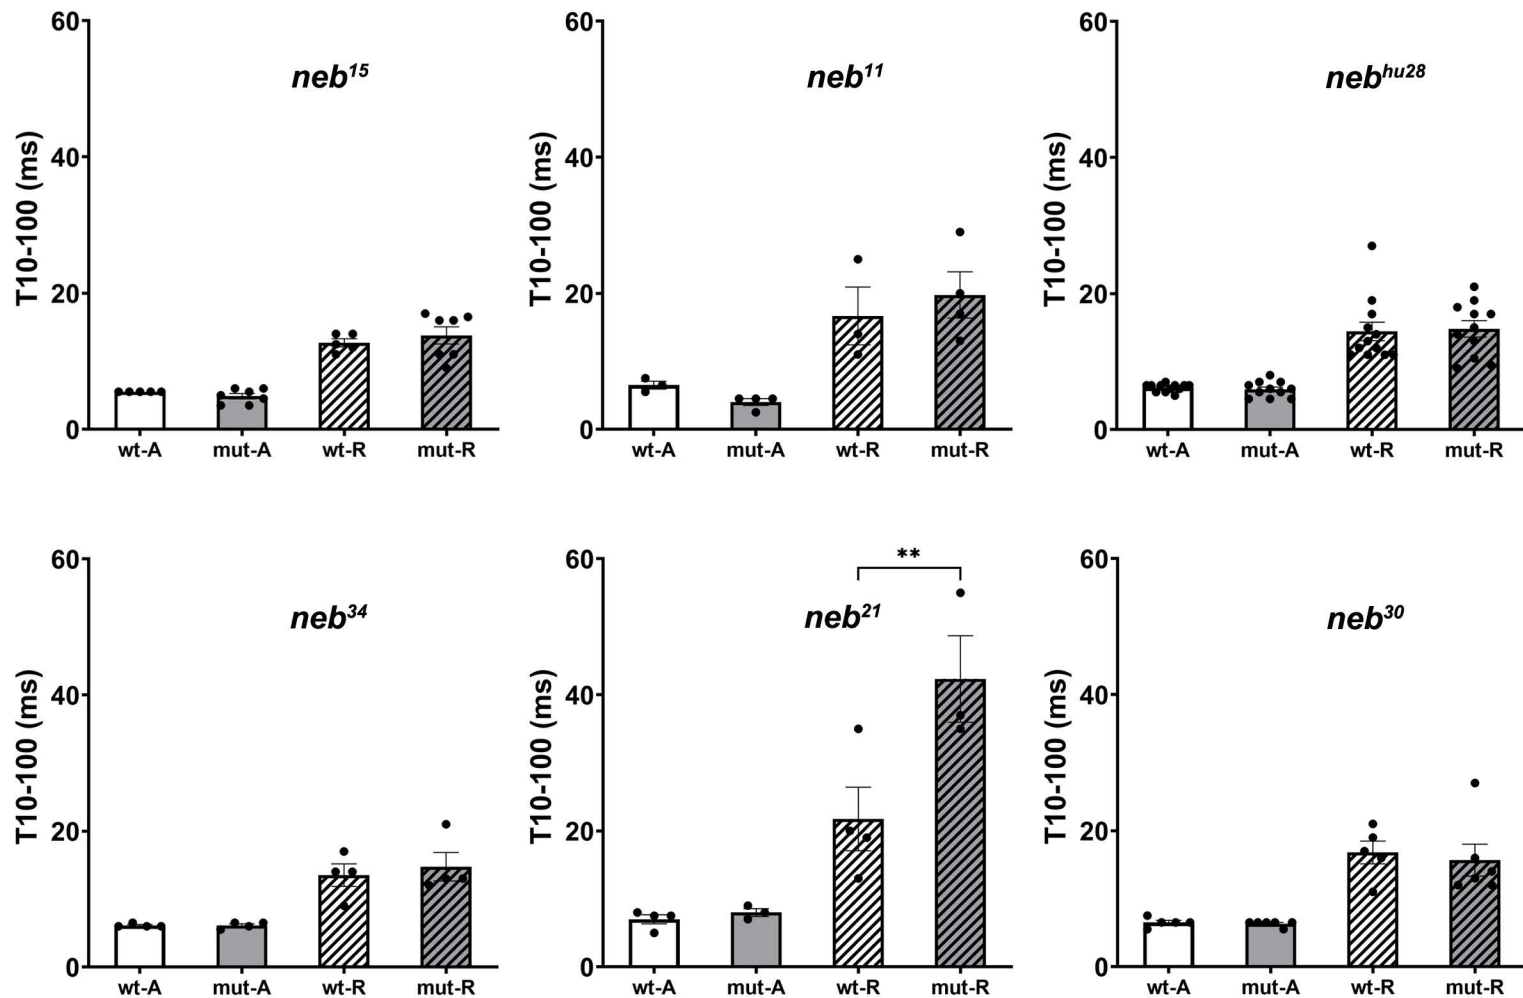

A = Activation kinetics at optimal sarcomere length  
R = Relaxation kinetics at optimal sarcomere length

Suppl Fig 7 - muscle genes

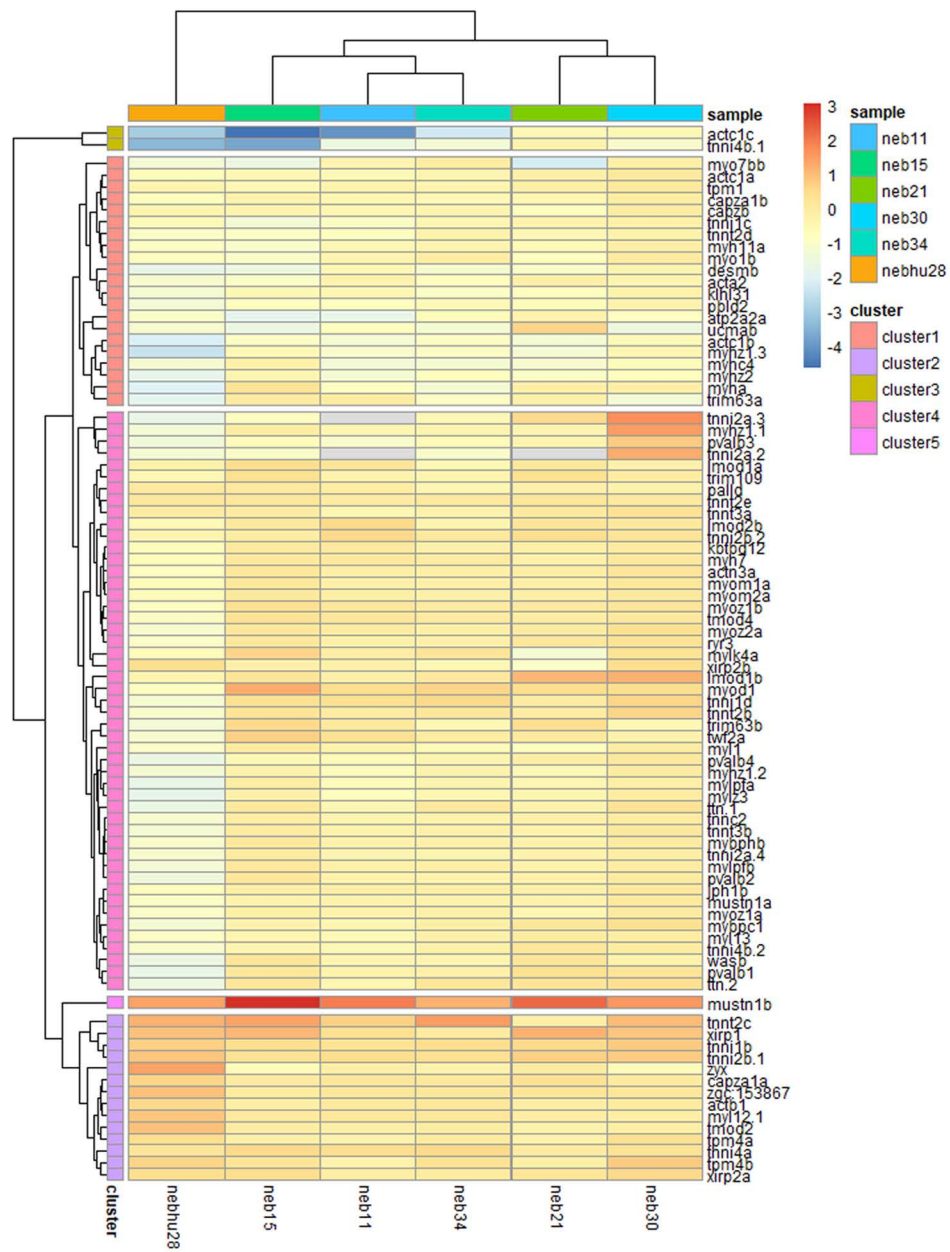

## SUPPLEMENTAL FIGURE LEGENDS

**Supplemental Figure 1. DNA sequences and predicted aminoacid sequences of *neb* nonsense mutants.** Point mutations in *neb*<sup>15</sup> (exon 45) and *neb*<sup>11</sup> (exon 89) result in formation of a premature stop codon.

Alt text:

decorative

**Supplemental Figure 2. Alternative splicing in *neb*<sup>hu28</sup>.** **A.** Sashimi plot generated with Integrative Genome Viewer (IGV) depicting expression of exons 46-47 and splice junctions from aligned RNA-seq data in one of the wt (red) and four *neb*<sup>hu28</sup> mutant replicates (blue, green, brown, purple), which harbour a point mutation in the splice donor site of intron 46 (C>T). One alternative splicing event is noticeable in the mutant sashimi plots: use of alternate splice donor site located in exon 46. **B.** DNA and predicted aminoacid sequences of *neb*<sup>hu28</sup> mutant. Splicing analysis identified an alternative splice donor site (blue arrowhead) located 5 bp downstream of the regular splice donor site, in intron 46.

Alt text:

decorative

**Supplemental Figure 3. Alternative splicing in *neb*<sup>34</sup>.** **A.** Sashimi plot generated with Integrative Genome Viewer (IGV) depicting expression of exons 54-55 and splice junctions from aligned RNA-seq data in one of the wt (red) and four *neb*<sup>34</sup> mutant replicates (blue, green, brown, purple), which harbour a point mutation in the splice donor site of intron 54 (C>T). Two alternative splicing events are noticeable in the mutant sashimi plots: full intron inclusion and use of alternate splice donor site located in exon 54. **B.** DNA and predicted aminoacid (aa) sequences of *neb*<sup>34</sup> mutant. Splicing analysis identified an alternative splice donor site (blue arrowhead) located 18 bp upstream of the regular splice donor site.



Alt text:  
decorative

**Supplemental Figure 4. Alternative splicing in *neb*<sup>21</sup>.** **A.** Sashimi plot generated with Integrative Genome Viewer (IGV) depicting expression of exons 105-106 and splice junctions from aligned RNA-seq data in one of the wt (red) and four *neb*<sup>21</sup> mutant replicates (blue, green, brown, purple), which harbour a point mutation in the splice acceptor site of intron 105 (T>G). Three alternative splicing events are noticeable in the mutant sashimi plots: full intron inclusion and use of two alternate splice acceptor sites located in intron 105. **B.** DNA and predicted aminoacid sequences of *neb*<sup>21</sup> mutant. Splicing analysis identified two alternative splice acceptor sites (light and dark blue arrowheads) located in the intronic region.

Alt text:  
decorative

**Supplemental Figure 5. Alternative splicing in *neb*<sup>30</sup>.** **A.** Sashimi plot generated with Integrative Genome Viewer (IGV) depicting expression of exons 133-134 and splice junctions from aligned RNA-seq data in one of the wt (red) and four *neb*<sup>30</sup> mutant replicates (blue, green, brown, purple), which harbour a point mutation in the splice acceptor site of intron 133 (C>T). Two alternative splicing events are noticeable in the mutant sashimi plots: full intron inclusion and use of an alternate splice acceptor site located in exon 134. **B.** DNA and predicted aminoacid sequences of *neb*<sup>30</sup> mutant. Splicing analysis identified an alternative splice acceptor site (blue arrowhead) located in exon 134.

Alt text:  
decorative

**Supplemental Figure 6. Kinetics of muscle contraction in *neb* mutants.** Graphs illustrating activation (left column) and relaxation (right column) kinetics of 1Hz

stimulated contractions in *neb* mutants (mean  $\pm$  SEM). There was no significant difference in the rate of force development or relaxation in any of six *neb* mutants from this study. Asterisks indicate p-values. (\*  $\leq$  0.05; \*\*  $\leq$  0.01; \*\*\*  $\leq$  0.001; \*\*\*\*  $\leq$  0.0001). See Suppl. Table 5 for measurements and statistics.

Alt text:

There is no significant difference in activation and relaxation kinetics at optimal sarcomere length between *neb* mutants and their wild-type siblings. refer to supplemental table five for measurements and statistics.

**Supplemental Figure 7. Expression of muscle-relevant genes in *neb* mutants.**

Dendrogram and heatmap illustrating expression of several muscle-relevant genes in nebulin mutants. Noticeable, *mustn1b* is the only gene from this selected group that is upregulated in all the *neb* mutants investigated in this study. *actc1a* and *tnni4b* are drastically downregulated in most of the mutants and clustering together.

Alt text:

decorative

|            |             | average intensity |                   |                   |
|------------|-------------|-------------------|-------------------|-------------------|
|            |             | wt                | neb <sup>34</sup> | neb <sup>30</sup> |
| myofiber 1 | sarcomere 1 | 98.56             | 63.04             | 76.45             |
|            | sarcomere 2 | 93.68             | 74.53             | 81.94             |
|            | sarcomere 3 | 92.51             | 57.96             | 83.18             |
|            | sarcomere 4 | 102.43            | 56.73             | 84.25             |
|            | sarcomere 5 | 95.59             | 53.5              | 79.74             |
|            | sarcomere 6 | 82.39             | 56.92             | 90.53             |
|            | sarcomere 7 | 93.1              | 48.27             | 88.34             |
|            | sarcomere 8 | 94.42             | 66.82             | 85.88             |
| myofiber 2 | sarcomere 1 | 99.48             | 28.43             | 76.55             |
|            | sarcomere 2 | 101.39            | 28.81             | 82.32             |
|            | sarcomere 3 | 100.7             | 31.13             | 78.41             |
|            | sarcomere 4 | 100.69            | 30.44             | 83.65             |
|            | sarcomere 5 | 102.67            | 40.1              | 78.73             |
|            | sarcomere 6 | 102.37            | 38.77             | 68.66             |
|            | sarcomere 7 | 99.62             | 46.18             | 75.8              |
|            | sarcomere 8 | 97.38             | 50                | 80.06             |
| myofiber 3 | sarcomere 1 | 81.45             | 69.41             | 79.83             |
|            | sarcomere 2 | 84.21             | 55.46             | 76.65             |
|            | sarcomere 3 | 87.75             | 60.86             | 81.69             |
|            | sarcomere 4 | 86.28             | 52.61             | 74.99             |
|            | sarcomere 5 | 84.55             | 64.06             | 81.77             |
|            | sarcomere 6 | 83.18             | 67.29             | 79.36             |
|            | sarcomere 7 | 81.97             | 56.42             | 89.55             |
|            | sarcomere 8 | 87.36             | 65.69             | 88.94             |
| myofiber 4 | sarcomere 1 | 98.25             | 66.75             | 95.15             |
|            | sarcomere 2 | 98.25             | 72.83             | 89.8              |
|            | sarcomere 3 | 101.19            | 63.06             | 90.68             |
|            | sarcomere 4 | 101.97            | 59.49             | 98.87             |
|            | sarcomere 5 | 91.08             | 52.57             | 83.2              |
|            | sarcomere 6 | 94.13             | 49.74             | 96.87             |
|            | sarcomere 7 | 86.66             | 64.24             | 94.22             |
|            | sarcomere 8 | 101.59            | 66.88             | 87.53             |
| myofiber 5 | sarcomere 1 | 64.91             | 60.81             | 63.64             |
|            | sarcomere 2 | 75.93             | 57.98             | 57.92             |
|            | sarcomere 3 | 87.11             | 50.26             | 64.47             |
|            | sarcomere 4 | 87.89             | 63.28             | 68.14             |
|            | sarcomere 5 | 84.3              | 61.16             | 71.43             |
|            | sarcomere 6 | 81.06             | 52.73             | 67.14             |
|            | sarcomere 7 | 81.36             | 63.37             | 68.84             |
|            | sarcomere 8 | 80.22             | 56.03             | 69.67             |
| myofiber 6 | sarcomere 1 | 102.59            | 51.53             | 102.66            |
|            | sarcomere 2 | 101.59            | 50.6              | 102.64            |
|            | sarcomere 3 | 96.81             | 41.33             | 102.67            |
|            | sarcomere 4 | 101.62            | 33.43             | 102.67            |
|            | sarcomere 5 | 100.74            | 36.89             | 102.67            |
|            | sarcomere 6 | 101.16            | 48.13             | 102.67            |
|            | sarcomere 7 | 98.55             | 46.92             | 102.67            |
|            | sarcomere 8 | 98.7              | 41.62             | 102.67            |
| myofiber 7 | sarcomere 1 | 99.89             | 48.47             | 102.67            |
|            | sarcomere 2 | 97.5              | 52.08             | 102.67            |
|            | sarcomere 3 | 98.96             | 51.91             | 102.67            |
|            | sarcomere 4 | 98.67             | 51.74             | 102.67            |
|            | sarcomere 5 | 102.54            | 51.56             | 102.67            |
|            | sarcomere 6 | 95.51             | 39.2              | 102.67            |
|            | sarcomere 7 | 96.45             | 46.14             | 102.67            |
|            | sarcomere 8 | 97.93             | 44.58             | 102.67            |
| n          |             | 56                | 56                | 56                |
| Mean       |             | 93.55             | 52.87             | 86.74             |
| SEM        |             | 1.139             | 1.509             | 1.736             |
| %          |             |                   | 56.50%            | 92.70%            |

**Supplemental Table 1.** Average fluorescence intensity measurements of anti Neb-N antibody staining in myofiber preparations and descriptive statistics

|               |        | wt         |                   | neb <sup>15</sup> |                   | neb <sup>11</sup> |                   | neb <sup>34</sup> |                   | neb <sup>21</sup> |                   | neb <sup>30</sup> |                   |
|---------------|--------|------------|-------------------|-------------------|-------------------|-------------------|-------------------|-------------------|-------------------|-------------------|-------------------|-------------------|-------------------|
|               |        | n (pixels) | average intensity | n (pixels)        | average intensity | n (pixels)        | average intensity | n (pixels)        | average intensity | n (pixels)        | average intensity | n (pixels)        | average intensity |
| measurement 1 | fish 1 | 148        | 254.40            | 145               | 156.28            | 184               | 174.32            | 138               | 165.56            | 168               | 136.39            | 117               | 255.00            |
|               | fish 2 | 147        | 254.92            | 156               | 97.59             | 145               | 113.32            | 175               | 210.39            | 183               | 81.21             | 121               | 251.45            |
|               | fish 3 | 135        | 255.00            | 146               | 124.93            | 122               | 35.39             | 160               | 153.63            | 147               | 154.28            | 117               | 253.10            |
|               | fish 4 | 124        | 255.00            | 131               | 175.58            | 147               | 100.64            | 157               | 174.27            | 147               | 43.17             | 124               | 255.00            |
|               | fish 5 | 135        | 255.00            | 150               | 159.04            | 121               | 120.42            | 164               | 186.36            | 154               | 58.03             | 142               | 255.00            |
|               | fish 6 | 169        | 250.24            |                   |                   |                   |                   |                   |                   |                   |                   |                   |                   |
|               | fish 7 | 140        | 255.00            |                   |                   |                   |                   |                   |                   |                   |                   |                   |                   |
|               | fish 8 | 158        | 255.00            |                   |                   |                   |                   |                   |                   |                   |                   |                   |                   |
| measurement 2 | fish 1 | 142        | 254.97            | 143               | 194.88            | 156               | 233.27            | 144               | 201.54            | 121               | 187.05            | 255.00            | 255.00            |
|               | fish 2 | 122        | 255.00            | 135               | 181.41            | 132               | 187.08            | 145               | 234.83            | 180               | 161.42            | 255.00            | 255.00            |
|               | fish 3 | 111        | 254.94            | 132               | 189.16            | 99                | 61.12             | 137               | 221.50            | 136               | 231.19            | 254.77            | 254.77            |
|               | fish 4 | 120        | 254.95            | 117               | 234.72            | 155               | 44.15             | 132               | 206.52            | 125               | 85.69             | 255.00            | 255.00            |
|               | fish 5 | 110        | 255.00            | 145               | 216.88            | 132               | 154.34            | 148               | 231.09            | 150               | 153.58            | 255.00            | 255.00            |
|               | fish 6 | 153        | 254.62            |                   |                   |                   |                   |                   |                   |                   |                   |                   |                   |
|               | fish 7 | 123        | 255.00            |                   |                   |                   |                   |                   |                   |                   |                   |                   |                   |
|               | fish 8 | 151        | 255.00            |                   |                   |                   |                   |                   |                   |                   |                   |                   |                   |
| n             |        | 16         |                   | 10                |                   | 10                |                   | 10                |                   | 10                |                   | 10                |                   |
| Mean          |        | 254.6      |                   | 122.4             |                   | 173               |                   | 198.6             |                   | 129.2             |                   | 254.4             |                   |
| SEM           |        | 0.2955     |                   | 20.6              |                   | 12.92             |                   | 8.793             |                   | 19.07             |                   | 0.3806            |                   |

**Supplemental Table 2.** Average birefringence intensity measurements (grey scale value) and descriptive statistics.

| zebrafish line            | neb <sup>15</sup> |            |            | neb <sup>11</sup> |            |            | neb <sup>34</sup> |            |            | neb <sup>21</sup> |            |            | neb <sup>30</sup> |            |            |
|---------------------------|-------------------|------------|------------|-------------------|------------|------------|-------------------|------------|------------|-------------------|------------|------------|-------------------|------------|------------|
| <b>recorded values</b>    |                   |            |            |                   |            |            |                   |            |            |                   |            |            |                   |            |            |
| <b>time spent moving</b>  | <b>wt</b>         | <b>het</b> | <b>mut</b> | <b>wt</b>         | <b>het</b> | <b>mut</b> | <b>wt</b>         | <b>het</b> | <b>mut</b> | <b>wt</b>         | <b>het</b> | <b>mut</b> | <b>wt</b>         | <b>het</b> | <b>mut</b> |
| n                         | 11                | 14         | 12         | 9                 | 24         | 21         | 12                | 11         | 23         | 9                 | 17         | 8          | 13                | 19         | 16         |
| mean                      | 145.50            | 142.50     | 92.00      | 130.33            | 117.07     | 93.47      | 153.70            | 170.70     | 131.90     | 164.10            | 150.30     | 129.20     | 140.20            | 114.90     | 137.50     |
| SEM                       | 10.77             | 8.75       | 4.45       | 11.29             | 6.00       | 5.55       | 11.39             | 10.64      | 7.13       | 9.18              | 8.32       | 12.57      | 13.16             | 8.43       | 9.45       |
| <b>distance travelled</b> | <b>wt</b>         | <b>het</b> | <b>mut</b> | <b>wt</b>         | <b>het</b> | <b>mut</b> | <b>wt</b>         | <b>het</b> | <b>mut</b> | <b>wt</b>         | <b>het</b> | <b>mut</b> | <b>wt</b>         | <b>het</b> | <b>mut</b> |
| n                         | 11                | 14         | 12         | 9                 | 24         | 21         | 12                | 11         | 23         | 9                 | 17         | 8          | 13                | 19         | 16         |
| mean                      | 386.60            | 386.20     | 167.80     | 360.50            | 337.80     | 230.00     | 428.60            | 447.00     | 304.00     | 367.90            | 389.80     | 300.90     | 347.10            | 301.90     | 353.40     |
| SEM                       | 33.34             | 23.85      | 9.48       | 30.11             | 15.24      | 13.49      | 23.78             | 25.77      | 16.21      | 27.36             | 22.01      | 39.01      | 32.59             | 28.66      | 23.79      |
| % change                  |                   |            | 43.40      |                   |            | 63.80      |                   |            | 70.93      |                   |            | 81.79      |                   |            | 101.82     |
| <b>average speed</b>      | <b>wt</b>         | <b>het</b> | <b>mut</b> | <b>wt</b>         | <b>het</b> | <b>mut</b> | <b>wt</b>         | <b>het</b> | <b>mut</b> | <b>wt</b>         | <b>het</b> | <b>mut</b> | <b>wt</b>         | <b>het</b> | <b>mut</b> |
| n                         | 11                | 14         | 12         | 9                 | 24         | 21         | 12                | 11         | 23         | 9                 | 17         | 8          | 13                | 19         | 16         |
| mean                      | 2.64              | 2.75       | 1.84       | 2.85              | 2.98       | 2.50       | 2.92              | 2.66       | 2.38       | 2.27              | 2.65       | 2.29       | 2.53              | 2.64       | 2.62       |
| SEM                       | 0.12              | 0.14       | 0.08       | 0.19              | 0.14       | 0.12       | 0.21              | 0.12       | 0.15       | 0.17              | 0.14       | 0.18       | 0.17              | 0.22       | 0.14       |
| <b>normalized values</b>  |                   |            |            |                   |            |            |                   |            |            |                   |            |            |                   |            |            |
| <b>time spent moving</b>  | <b>wt</b>         | <b>het</b> | <b>mut</b> | <b>wt</b>         | <b>het</b> | <b>mut</b> | <b>wt</b>         | <b>het</b> | <b>mut</b> | <b>wt</b>         | <b>het</b> | <b>mut</b> | <b>wt</b>         | <b>het</b> | <b>mut</b> |
| n                         | 11                | 14         | 12         | 9                 | 24         | 21         | 12                | 11         | 23         | 9                 | 17         | 8          | 13                | 19         | 16         |
| mean                      | 1.00              | 0.98       | 0.63       | 1.00              | 0.90       | 0.72       | 1.00              | 1.11       | 0.86       | 1.00              | 0.92       | 0.79       | 1.00              | 0.82       | 0.98       |
| SEM                       | 0.07              | 0.06       | 0.03       | 0.09              | 0.05       | 0.04       | 0.07              | 0.07       | 0.05       | 0.06              | 0.05       | 0.08       | 0.09              | 0.06       | 0.07       |
| <b>distance travelled</b> | <b>wt</b>         | <b>het</b> | <b>mut</b> | <b>wt</b>         | <b>het</b> | <b>mut</b> | <b>wt</b>         | <b>het</b> | <b>mut</b> | <b>wt</b>         | <b>het</b> | <b>mut</b> | <b>wt</b>         | <b>het</b> | <b>mut</b> |
| n                         | 11                | 14         | 12         | 9                 | 24         | 21         | 12                | 11         | 23         | 9                 | 17         | 8          | 13                | 19         | 16         |
| mean                      | 1.00              | 1.00       | 0.43       | 1.00              | 0.94       | 0.64       | 1.00              | 1.04       | 0.71       | 1.00              | 1.06       | 0.82       | 1.00              | 0.87       | 1.02       |
| SEM                       | 0.09              | 0.06       | 0.02       | 0.08              | 0.04       | 0.04       | 0.06              | 0.06       | 0.04       | 0.07              | 0.06       | 0.11       | 0.09              | 0.08       | 0.07       |
| <b>average speed</b>      | <b>wt</b>         | <b>het</b> | <b>mut</b> | <b>wt</b>         | <b>het</b> | <b>mut</b> | <b>wt</b>         | <b>het</b> | <b>mut</b> | <b>wt</b>         | <b>het</b> | <b>mut</b> | <b>wt</b>         | <b>het</b> | <b>mut</b> |
| n                         | 11                | 14         | 12         | 9                 | 24         | 21         | 12                | 11         | 23         | 9                 | 17         | 8          | 13                | 19         | 16         |
| mean                      | 1.00              | 1.04       | 0.70       | 1.00              | 1.05       | 0.88       | 1.00              | 0.91       | 0.81       | 1.00              | 1.17       | 1.01       | 1.00              | 1.05       | 1.04       |
| SEM                       | 0.05              | 0.05       | 0.03       | 0.07              | 0.05       | 0.04       | 0.07              | 0.04       | 0.05       | 0.08              | 0.06       | 0.08       | 0.07              | 0.09       | 0.06       |

**Supplemental Table 3.** Descriptive statistics for swim assay measurements (recorded and normalized values for time spent moving, distance travelled, average speed)

| Frequency | 1Hz            | 5 Hz  | 10 Hz | 20 Hz | 40 Hz | 60 Hz | 80 Hz | 100 Hz | 150 Hz | 200 Hz | 1Hz                                                  | 5 Hz  | 10 Hz | 20 Hz | 40 Hz | 60 Hz | 80 Hz | 100 Hz | 150 Hz | 200 Hz |    |
|-----------|----------------|-------|-------|-------|-------|-------|-------|--------|--------|--------|------------------------------------------------------|-------|-------|-------|-------|-------|-------|--------|--------|--------|----|
|           | neb15 wt sib   |       |       |       |       |       |       |        |        |        | neb15 mut                                            |       |       |       |       |       |       |        |        |        |    |
|           | 8.45           | 8.17  | 7.98  | 7.88  | 8.02  | 7.58  | 7.25  | 7.42   | 11.96  | 16.27  | 5.52                                                 | 5.25  | 5.30  | 5.38  | 5.44  | 5.34  | 7.94  | 9.94   | 13.62  | 15.40  |    |
|           | 34.62          | 33.69 | 33.79 | 32.31 | 33.30 | 32.67 | 31.74 | 30.85  | 37.29  | 47.45  | 1.81                                                 | 1.84  | 1.89  | 1.86  | 2.84  | 4.34  | 6.32  | 8.10   | 12.68  | 13.14  |    |
|           | 16.47          | 16.24 | 16.70 | 16.45 | 17.82 | 17.48 | 17.61 | 17.30  | 28.55  | 37.23  | 1.84                                                 | 1.81  | 1.58  | 1.83  | 2.63  | 4.17  | 6.68  | 7.70   | 9.12   | 10.38  |    |
|           | 6.04           | 6.27  | 6.41  | 6.43  | 6.63  | 6.40  | 6.94  | 10.15  | 18.33  | 24.37  | 1.87                                                 | 2.01  | 1.90  | 2.04  | 2.07  | 3.05  | 5.32  | 6.86   | 9.19   | 10.46  |    |
|           | 13.43          | 12.89 | 13.15 | 13.39 | 13.24 | 12.81 | 12.95 | 15.76  | 30.95  | 40.40  | 2.50                                                 | 2.42  | 2.64  | 2.76  | 3.49  | 5.30  | 8.39  | 11.30  | 14.95  | 16.88  |    |
| n         | 5              | 5     | 5     | 5     | 5     | 5     | 5     | 5      | 5      | 5      | 0.79                                                 | 1.08  | 1.15  | 0.94  | 1.22  | 1.65  | 2.37  | 3.12   | 4.60   | 5.14   |    |
| Mean      | 15.80          | 15.45 | 15.61 | 15.29 | 15.80 | 15.39 | 15.30 | 16.30  | 25.42  | 33.15  | 2.18                                                 | 2.21  | 2.21  | 2.26  | 2.67  | 3.57  | 5.51  | 7.00   | 9.65   | 10.78  |    |
| SEM       | 11.29          | 10.92 | 10.96 | 10.35 | 10.74 | 10.63 | 10.20 | 9.08   | 10.16  | 12.61  | 1.59                                                 | 1.42  | 1.47  | 1.51  | 1.51  | 1.68  | 2.63  | 3.39   | 4.44   | 4.85   |    |
| SD        | 5.05           | 4.88  | 4.90  | 4.63  | 4.80  | 4.75  | 4.56  | 4.06   | 4.54   | 5.64   | 0.60                                                 | 0.54  | 0.55  | 0.57  | 0.57  | 0.63  | 0.99  | 1.28   | 1.68   | 1.83   |    |
|           |                |       |       |       |       |       |       |        |        |        | percentage force at 200 Hz (compared to wt siblings) |       |       |       |       |       |       |        |        |        | 33 |
|           | neb11 wt sib   |       |       |       |       |       |       |        |        |        | neb11 mut                                            |       |       |       |       |       |       |        |        |        |    |
|           | 31.11          | 31.01 | 29.15 | 27.40 | 27.58 | 25.28 | 24.70 | 23.68  | 25.65  | 26.09  | 2.98                                                 | 2.99  | 2.99  | 2.93  | 2.90  | 2.83  | 2.62  | 3.02   | 5.05   | 5.94   |    |
|           | 24.05          | 24.04 | 23.45 | 23.66 | 22.81 | 22.76 | 23.78 | 24.63  | 25.95  | 26.68  | 0.96                                                 | 0.80  | 0.88  | 0.79  | 0.86  | 0.94  | 0.84  | 0.92   | 1.03   | 1.57   |    |
|           | 32.93          | 32.74 | 30.62 | 31.66 | 29.72 | 29.04 | 27.95 | 26.77  | 30.17  | 30.43  | 4.81                                                 | 4.87  | 4.71  | 4.73  | 4.82  | 5.73  | 5.70  | 5.62   | 6.30   | 5.94   |    |
| n         | 3              | 3     | 3     | 3     | 3     | 3     | 3     | 3      | 3      | 3      | 5.22                                                 | 5.21  | 4.93  | 4.95  | 5.01  | 5.63  | 5.82  | 5.95   | 6.93   | 6.59   |    |
| Mean      | 29.36          | 29.26 | 27.74 | 27.57 | 26.70 | 25.69 | 25.47 | 25.03  | 27.26  | 27.73  | 4                                                    | 4     | 4     | 4     | 4     | 4     | 4     | 4      | 4      | 4      |    |
| SEM       | 2.71           | 2.66  | 2.19  | 2.31  | 2.04  | 1.83  | 1.27  | 0.91   | 1.46   | 1.36   | 3.49                                                 | 3.47  | 3.38  | 3.35  | 3.40  | 3.79  | 3.75  | 3.88   | 4.83   | 5.01   |    |
| SD        | 4.69           | 4.61  | 3.79  | 4.00  | 3.54  | 3.16  | 2.19  | 1.58   | 2.53   | 2.35   | 1.95                                                 | 2.03  | 1.88  | 1.93  | 1.94  | 2.32  | 2.44  | 2.37   | 2.65   | 2.32   |    |
|           |                |       |       |       |       |       |       |        |        |        | percentage force at 200 Hz (compared to wt siblings) |       |       |       |       |       |       |        |        |        | 18 |
|           | nebhu28 wt sib |       |       |       |       |       |       |        |        |        | nebhu28 mut                                          |       |       |       |       |       |       |        |        |        |    |
|           | 20.14          | 18.52 | 17.76 | 17.61 | 16.21 | 16.15 | 16.10 | 14.98  | 18.61  | 21.15  | 2.04                                                 | 2.12  | 2.04  | 1.79  | 1.72  | 1.75  | 1.84  | 1.97   | 2.91   | 3.03   |    |
|           | 14.97          | 14.87 | 13.86 | 14.50 | 14.12 | 13.54 | 13.08 | 14.01  | 17.00  | 20.29  | 0.21                                                 | 0.20  | 0.24  | 0.23  | 0.19  | 0.18  | 0.20  | 0.20   | 0.27   | 0.27   |    |
|           | 16.89          | 15.70 | 16.30 | 15.96 | 15.43 | 15.21 | 15.77 | 16.79  | 18.44  | 20.52  | 0.88                                                 | 0.82  | 0.84  | 0.78  | 0.81  | 0.74  | 0.66  | 0.75   | 0.88   | 1.04   |    |
|           | 17.80          | 17.40 | 17.08 | 16.63 | 16.18 | 15.85 | 15.93 | 15.77  | 18.40  | 19.98  | 2.11                                                 | 2.20  | 2.05  | 2.00  | 1.96  | 1.97  | 1.89  | 1.94   | 2.80   | 3.37   |    |
|           | 11.60          | 11.71 | 11.48 | 11.80 | 10.31 | 9.00  | 8.66  | 7.79   | 8.33   | 9.58   | 0.54                                                 | 0.63  | 0.64  | 0.65  | 0.91  | 1.24  | 1.62  | 2.07   | 1.95   | 2.29   |    |
|           | 30.79          | 31.26 | 31.31 | 31.33 | 29.74 | 29.39 | 29.07 | 31.68  | 34.67  | 35.81  | 1.64                                                 | 1.68  | 1.55  | 1.61  | 1.56  | 1.60  | 2.40  | 2.67   | 3.77   | 3.99   |    |
|           | 28.84          | 27.89 | 28.38 | 31.06 | 25.58 | 26.38 | 26.27 | 26.27  | 32.97  | 28.74  | 1.79                                                 | 1.70  | 1.66  | 1.74  | 1.70  | 1.66  | 1.65  | 1.82   | 2.35   | 3.24   |    |
|           | 29.66          | 30.30 | 28.89 | 28.11 | 26.55 | 25.65 | 23.85 | 23.94  | 27.26  | 27.89  | 0.53                                                 | 0.53  | 0.54  | 0.52  | 0.54  | 0.48  | 0.61  | 0.72   | 1.10   | 1.08   |    |
|           | 34.81          | 34.98 | 33.75 | 33.16 | 32.39 | 31.72 | 30.49 | 29.84  | 35.67  | 36.42  | 5.19                                                 | 5.12  | 4.99  | 5.00  | 4.97  | 5.23  | 5.50  | 5.76   | 7.03   | 7.44   |    |
|           | 40.97          | 43.84 | 43.77 | 43.77 | 42.36 | 37.46 | 36.34 | 38.70  | 44.69  | 40.82  | 4.37                                                 | 4.54  | 4.33  | 4.50  | 4.67  | 5.05  | 4.99  | 5.18   | 6.00   | 6.35   |    |
| n         | 10             | 10    | 10    | 10    | 10    | 10    | 10    | 10     | 10     | 10     | 7.12                                                 | 6.65  | 6.46  | 5.99  | 5.01  | 4.90  | 4.88  | 4.53   | 6.03   | 5.59   |    |
| Mean      | 24.65          | 24.64 | 24.26 | 24.39 | 22.89 | 22.03 | 21.56 | 21.98  | 25.60  | 26.12  | 0.34                                                 | 0.37  | 0.30  | 0.39  | 0.37  | 0.37  | 0.38  | 0.39   | 0.47   | 0.50   |    |
| SEM       | 9.67           | 10.51 | 10.47 | 10.50 | 10.10 | 9.31  | 8.92  | 9.64   | 11.20  | 9.59   | 12                                                   | 12    | 12    | 12    | 12    | 12    | 12    | 12     | 12     | 12     |    |
| SD        | 3.06           | 3.32  | 3.31  | 3.32  | 3.19  | 2.94  | 2.82  | 3.05   | 3.54   | 3.03   | 2.23                                                 | 2.21  | 2.14  | 2.10  | 2.03  | 2.10  | 2.22  | 2.33   | 2.96   | 3.18   |    |
|           |                |       |       |       |       |       |       |        |        |        | percentage force at 200 Hz (compared to wt siblings) |       |       |       |       |       |       |        |        |        | 12 |
|           | neb34 wt sib   |       |       |       |       |       |       |        |        |        | neb34 mut                                            |       |       |       |       |       |       |        |        |        |    |
|           | 31.86          | 33.41 | 32.98 | 31.78 | 28.90 | 26.24 | 27.75 | 30.58  | 36.92  | 41.66  | 2.98                                                 | 2.99  | 2.99  | 2.93  | 2.90  | 2.83  | 2.62  | 3.02   | 5.05   | 5.94   |    |
|           | 42.32          | 39.69 | 39.27 | 37.10 | 35.02 | 34.56 | 34.67 | 35.11  | 40.83  | 42.17  | 13.82                                                | 13.97 | 13.62 | 13.98 | 13.85 | 14.11 | 14.70 | 17.00  | 19.74  | 19.99  |    |
|           | 29.12          | 28.32 | 27.24 | 26.51 | 25.58 | 25.21 | 24.29 | 24.59  | 28.68  | 28.96  | 10.37                                                | 10.53 | 9.82  | 9.78  | 9.17  | 8.78  | 8.80  | 9.44   | 10.95  | 12.61  |    |
|           | 6.49           | 10.66 | 11.92 | 11.97 | 11.10 | 9.15  | 8.91  | 8.89   | 10.59  | 13.18  | 8.53                                                 | 8.52  | 8.58  | 8.36  | 8.32  | 7.83  | 8.03  | 8.80   | 10.83  | 11.54  |    |
| n         | 4              | 4     | 4     | 4     | 4     | 4     | 4     | 4      | 4      | 4      | 7.09                                                 | 7.19  | 7.02  | 6.92  | 6.63  | 6.60  | 6.40  | 7.66   | 10.07  | 10.70  |    |
| Mean      | 27.45          | 28.02 | 27.85 | 26.84 | 25.15 | 23.79 | 23.90 | 24.79  | 29.25  | 31.49  | 5                                                    | 5     | 5     | 5     | 5     | 5     | 5     | 5      | 5      | 5      |    |
| SEM       | 15.09          | 12.47 | 11.70 | 10.82 | 10.15 | 10.62 | 10.89 | 11.44  | 13.43  | 13.65  | 8.56                                                 | 8.64  | 8.41  | 8.39  | 8.18  | 8.03  | 8.11  | 9.18   | 11.33  | 12.16  |    |
| SD        | 7.54           | 6.24  | 5.85  | 5.41  | 5.07  | 5.31  | 5.44  | 5.72   | 6.72   | 6.83   | 4.01                                                 | 4.07  | 3.89  | 4.03  | 3.98  | 4.08  | 4.39  | 5.04   | 5.30   | 5.07   |    |
|           |                |       |       |       |       |       |       |        |        |        | percentage force at 200 Hz (compared to wt siblings) |       |       |       |       |       |       |        |        |        | 39 |
|           | neb21 wt sib   |       |       |       |       |       |       |        |        |        | neb21 mut                                            |       |       |       |       |       |       |        |        |        |    |
|           | 41.24          | 38.47 | 38.18 | 37.24 | 37.59 | 35.10 | 35.90 | 35.72  | 43.92  | 46.58  | 1.95                                                 | 2.36  | 2.54  | 3.20  | 4.45  | 5.36  | 6.78  | 7.58   | 8.52   | 8.28   |    |
|           | 6.15           | 6.04  | 5.91  | 6.67  | 9.58  | 11.45 | 13.84 | 15.04  | 17.99  | 17.89  | 7.20                                                 | 7.34  | 8.17  | 10.67 | 14.96 | 18.21 | 23.53 | 29.51  | 31.74  | 31.19  |    |
|           | 35.15          | 36.22 | 36.22 | 37.25 | 34.96 | 36.07 | 47.45 | 57.59  | 75.95  | 75.45  | 3.77                                                 | 4.06  | 5.00  | 6.31  | 8.20  | 10.47 | 13.45 | 14.76  | 16.88  | 15.76  |    |
|           | 23.06          | 22.81 | 22.16 | 21.85 | 22.33 | 22.52 | 24.57 | 29.44  | 29.93  | 31.62  | 7.96                                                 | 7.96  | 7.65  | 8.24  | 10.32 | 13.08 | 16.76 | 17.48  | 20.52  | 20.25  |    |
| n         | 4              | 4     | 4     | 4     | 4     | 4     | 4     | 4      | 4      | 4      | 4                                                    | 4     | 4     | 4     | 4     | 4     | 4     | 4      | 4      | 4      |    |
| Mean      | 26.40          | 25.89 | 25.62 | 25.75 | 26.11 | 26.28 | 30.44 | 34.45  | 41.95  | 42.88  | 5.22                                                 | 5.43  | 5.84  | 7.11  | 9.48  | 11.78 | 15.13 | 17.33  | 19.42  | 18.87  |    |
| SEM       | 15.47          | 14.93 | 14.95 | 14.64 | 12.88 | 11.66 | 14.48 | 17.69  | 25.02  | 24.67  | 2.84                                                 | 2.67  | 2.60  | 3.15  | 4.39  | 5.35  | 6.97  | 9.13   | 9.63   | 9.58   |    |
| SD        | 7.74           | 7.46  | 7.48  | 7.32  | 6.44  | 5.83  | 7.24  | 8.85   | 12.51  | 12.34  | 1.42                                                 | 1.33  | 1.30  | 1.58  | 2.19  | 2.68  | 3.49  | 4.56   | 4.82   | 4.79   |    |
|           |                |       |       |       |       |       |       |        |        |        | percentage force at 200 Hz (compared to wt siblings) |       |       |       |       |       |       |        |        |        | 44 |
|           | neb30 wt sib   |       |       |       |       |       |       |        |        |        | neb30 mut                                            |       |       |       |       |       |       |        |        |        |    |
|           | 8.62           | 8.28  | 7.24  | 6.90  | 6.77  | 6.30  | 5.64  | 5.62   | 4.94   | 5.64   | 19.27                                                | 18.95 | 18.55 | 17.76 | 17.49 | 16.66 | 16.41 | 15.73  | 16.40  | 16.92  |    |
|           | 38.12          | 38.13 | 38.30 | 37.57 | 34.54 | 32.42 | 31.58 | 31.66  | 34.53  | 35.33  | 14.46                                                | 15.06 | 14.71 | 14.97 | 14.89 | 12.71 | 12.11 | 12.19  | 13.11  | 13.68  |    |
|           | 34.19          | 34.66 | 34.96 | 35.75 | 33.50 | 31.73 | 35.13 | 37.08  | 39.06  | 42.70  | 7.44                                                 | 7.10  | 7.20  | 7.03  | 7.03  | 6.88  | 6.77  | 6.71   | 8.19   | 9.44   |    |
|           | 11.18          | 10.47 | 10.25 | 10.12 | 9.37  | 9.17  | 9.78  | 10.95  | 12.68  | 14.32  | 10.30                                                | 10.53 | 9.81  | 10.04 | 9.44  | 9.57  | 9.88  | 10.51  | 13.11  | 14.25  |    |
|           | 44.11          | 42.38 | 41.09 | 39.14 | 37.80 | 36.99 | 37.52 | 40.50  | 43.39  | 45.86  | 31.01                                                | 29.76 | 27.17 | 24.63 | 21.61 | 22.75 | 23.71 | 25.61  | 27.70  | 25.53  |    |
| n         | 5              | 5     | 5     | 5     | 5     | 5     | 5     | 5      | 5      | 5      | 21.77                                                | 23.20 | 23.00 | 22.38 | 21.41 | 20.64 | 21.16 | 21.12  | 24.63  | 25.51  |    |
| Mean      | 27.24          | 26.78 | 26.37 | 25.89 | 24.40 | 23.32 | 23.93 | 25.16  | 26.92  | 28.77  | 6                                                    | 6     | 6     | 6     | 6     | 6     | 6     | 6      | 6      | 6      |    |
| SEM       | 16.25          | 16.15 | 16.27 | 15.96 | 15.01 | 14.41 | 15.03 | 15.84  | 17.04  | 17.84  | 17.38                                                | 17.43 | 16.74 | 16.13 | 15.31 | 14.87 | 15.01 | 15.31  | 17.19  | 17.55  |    |
| SD        | 7.27           | 7.22  | 7.28  | 7.14  | 6.71  | 6.44  | 6.72  | 7.08   | 7.62   | 7.98   | 8.56                                                 | 8.34  | 7.67  | 6.86  | 6.08  | 6.25  | 6.61  | 7.02   | 7.49   | 6.62   |    |
|           |                |       |       |       |       |       |       |        |        |        | percentage force at 200 Hz (compared to wt siblings) |       |       |       |       |       |       |        |        |        | 61 |

Supplemental Table 4. Force production measurements at optimal sarcomere length (recorded values and descriptive statistics)

|                            |                | neb <sup>15</sup> |        | neb <sup>11</sup> |       | neb <sup>hu28</sup> |        | neb <sup>34</sup> |        | neb <sup>21</sup> |        | neb <sup>30</sup> |        |
|----------------------------|----------------|-------------------|--------|-------------------|-------|---------------------|--------|-------------------|--------|-------------------|--------|-------------------|--------|
|                            |                | wt                | mut    | wt                | mut   | wt                  | mut    | wt                | mut    | wt                | mut    | wt                | mut    |
| <b>Activation Kinetics</b> | <b>Slack</b>   |                   |        |                   |       |                     |        |                   |        |                   |        |                   |        |
|                            |                | 5                 | 5      | 4.5               | 4.5   | 5.5                 | 5.5    | 6                 | 5.5    | 8                 | 7      | 4.5               | 5.5    |
|                            |                | 5.5               | 3.5    | 5.5               | 5.5   | 4.5                 | 3.5    | 6                 | 5.5    | 8                 | 6      | 5.5               | 6.5    |
|                            |                | 5.5               | 6      | 5.5               | 4.5   | 5                   | 1.5    | 6                 | 6      | 6.5               |        | 5.5               | 5.5    |
|                            |                | 5.5               | 3.5    |                   | 4.5   | 4.5                 | 6.5    | 5.5               | 4.5    | 6                 |        | 6.5               | 6.5    |
|                            |                | 5.5               | 6      |                   |       | 4.5                 |        | 6                 |        |                   |        | 5.5               | 7      |
|                            |                |                   | 7.5    |                   |       | 7                   |        |                   |        |                   |        |                   |        |
|                            |                |                   | 6.5    |                   |       |                     |        |                   |        |                   |        |                   |        |
|                            | <b>n</b>       | 5                 | 7      | 3                 | 4     | 6                   | 4      | 5                 | 4      | 4                 | 2      | 5                 | 5      |
|                            | <b>Mean</b>    | 5.4               | 5.429  | 5.167             | 4.75  | 5.167               | 4.25   | 5.9               | 5.375  | 7.125             | 6.5    | 5.5               | 6.2    |
|                            | <b>SEM</b>     | 0.1               | 0.5714 | 0.3333            | 0.25  | 0.4014              | 1.109  | 0.1               | 0.3146 | 0.5154            | 0.5    | 0.3162            | 0.3    |
| <b>Activation Kinetics</b> | <b>Optimal</b> |                   |        |                   |       |                     |        |                   |        |                   |        |                   |        |
|                            |                | 5.5               | 6      | 5.5               | 4.5   | 6.5                 | 4.5    | 6                 | 6.5    | 8                 | 7      | 5.5               | 6.5    |
|                            |                | 5.5               | 3.5    | 7.5               | 2.5   | 6                   | 7      | 6.5               | 6.5    | 5                 | 9      | 6.5               | 6.5    |
|                            |                | 5.5               | 5.5    | 6.5               | 4.5   | 6.5                 | 6.5    | 6                 | 6      | 7.5               | 8      | 6.5               | 5.5    |
|                            |                | 5.5               | 3.5    |                   | 4.5   | 5.5                 | 7      | 6                 | 5.5    | 7.5               |        | 6.5               | 6.5    |
|                            |                | 5.5               | 5      |                   |       | 6.5                 | 5.5    |                   |        |                   |        | 7.5               | 6.5    |
|                            |                |                   | 4.5    |                   |       | 6.5                 | 6      |                   |        |                   |        |                   | 6.5    |
|                            |                |                   | 6      |                   |       | 7                   | 8      |                   |        |                   |        |                   |        |
|                            |                |                   |        |                   |       | 5.5                 | 4.5    |                   |        |                   |        |                   |        |
|                            |                |                   |        |                   |       | 6                   | 6      |                   |        |                   |        |                   |        |
|                            |                |                   |        |                   |       | 6.5                 | 5.5    |                   |        |                   |        |                   |        |
|                            |                |                   |        |                   |       | 5                   | 4.5    |                   |        |                   |        |                   |        |
|                            |                |                   |        |                   |       | 6.5                 |        |                   |        |                   |        |                   |        |
|                            | <b>n</b>       | 5                 | 7      | 3                 | 4     | 12                  | 11     | 4                 | 4      | 4                 | 3      | 5                 | 6      |
|                            | <b>Mean</b>    | 5.5               | 4.857  | 6.5               | 4     | 6.167               | 5.909  | 6.125             | 6.125  | 7                 | 8      | 6.5               | 6.333  |
|                            | <b>SEM</b>     | 0                 | 0.4041 | 0.5774            | 0.5   | 0.1667              | 0.3491 | 0.125             | 0.2394 | 0.677             | 0.5774 | 0.3162            | 0.1667 |
| <b>Relaxation Kinetics</b> | <b>Slack</b>   |                   |        |                   |       |                     |        |                   |        |                   |        |                   |        |
|                            |                | 6.5               | 13     | 9                 | 9     | 8                   | 13     | 10                | 11     | 10                | 26     | 7.5               | 12     |
|                            |                | 9                 | 10.5   | 13                | 15    | 10.5                | 8      | 9                 | 13     | 20                | 24     | 12                | 10     |
|                            |                | 9                 | 11.5   | 10                | 10    | 9                   | 8.5    | 11                | 11     | 13                |        | 11                | 9      |
|                            |                | 8                 | 12.5   |                   | 10    | 8                   | 10     | 10                | 12     | 10                |        | 9                 | 12     |
|                            |                | 11                | 9.5    |                   |       | 8                   |        | 8                 |        |                   |        | 13                | 12     |
|                            |                |                   | 8      |                   |       | 10                  |        |                   |        |                   |        |                   |        |
|                            |                |                   | 6.5    |                   |       |                     |        |                   |        |                   |        |                   |        |
|                            | <b>n</b>       | 5                 | 7      | 3                 | 4     | 6                   | 4      | 5                 | 4      | 4                 | 2      | 5                 | 5      |
|                            | <b>Mean</b>    | 8.7               | 10.21  | 10.67             | 11    | 8.917               | 9.875  | 9.6               | 11.75  | 13.25             | 25     | 10.5              | 11     |
|                            | <b>SEM</b>     | 0.7348            | 0.8988 | 1.202             | 1.354 | 0.4549              | 1.125  | 0.5099            | 0.4787 | 2.358             | 1      | 1                 | 0.6325 |
| <b>Relaxation Kinetics</b> | <b>Optimal</b> |                   |        |                   |       |                     |        |                   |        |                   |        |                   |        |
|                            |                | 11                | 16     | 11                | 13    | 19                  | 19     | 14                | 21     | 13                | 35     | 11                | 27     |
|                            |                | 12                | 16.5   | 25                | 17    | 14                  | 17     | 17                | 13     | 35                | 37     | 16                | 14     |
|                            |                | 14                | 16     | 14                | 29    | 27                  | 9      | 14                | 13     | 19                | 55     | 17                | 12     |
|                            |                | 12.5              | 17     |                   | 20    | 15                  | 21     | 9                 | 12     | 20                |        | 21                | 13     |
|                            |                | 14                | 11     |                   |       | 12                  | 17     |                   |        |                   |        | 19                | 16     |
|                            |                |                   | 9      |                   |       | 11                  | 18     |                   |        |                   |        |                   | 12     |
|                            |                |                   | 11     |                   |       | 11                  | 13     |                   |        |                   |        |                   |        |
|                            |                |                   |        |                   |       | 12                  | 14     |                   |        |                   |        |                   |        |
|                            |                |                   |        |                   |       | 13                  | 10.5   |                   |        |                   |        |                   |        |
|                            |                |                   |        |                   |       | 11                  | 9.5    |                   |        |                   |        |                   |        |
|                            |                |                   |        |                   |       | 11                  | 15     |                   |        |                   |        |                   |        |
|                            |                |                   |        |                   |       | 17                  |        |                   |        |                   |        |                   |        |
|                            | <b>n</b>       | 5                 | 7      | 3                 | 4     | 12                  | 11     | 4                 | 4      | 4                 | 3      | 5                 | 6      |
|                            | <b>Mean</b>    | 12.7              | 13.79  | 16.67             | 19.75 | 14.42               | 14.82  | 13.5              | 14.75  | 21.75             | 42.33  | 16.8              | 15.67  |
|                            | <b>SEM</b>     | 0.5831            | 1.253  | 4.256             | 3.4   | 1.368               | 1.207  | 1.658             | 2.097  | 4.679             | 6.36   | 1.685             | 2.348  |

**Supplemental Table 5.** Activation and relaxation kinetics (measurements and descriptive statistics)

| zebrafish line    | neb <sup>15</sup> |          |          | neb <sup>11</sup> |         |          | neb <sup>hu28</sup> |          |          | neb <sup>34</sup> |          |          | neb <sup>21</sup> |          |          | neb <sup>30</sup> |          |          |
|-------------------|-------------------|----------|----------|-------------------|---------|----------|---------------------|----------|----------|-------------------|----------|----------|-------------------|----------|----------|-------------------|----------|----------|
|                   | wt                | het      | mut      | wt                | het     | mut      | wt                  | het      | mut      | wt                | het      | mut      | wt                | het      | mut      | wt                | het      | mut      |
| n                 | 607               | 620      | 721      | 664               | 473     | 493      | 346                 | 528      | 301      | 161               | 136      | 330      | 1262              | 793      | 625      | 549               | 149      | 117      |
| mean              | 0.8075            | 0.8341   | 0.7588   | 0.8388            | 0.8529  | 0.7645   | 0.8192              | 0.8166   | 0.6928   | 0.8239            | 0.8308   | 0.7213   | 0.8301            | 0.8112   | 0.7816   | 0.8538            | 0.8161   | 0.8235   |
| SEM               | 0.002098          | 0.002382 | 0.002455 | 0.002033          | 0.00324 | 0.00274  | 0.002791            | 0.002774 | 0.005091 | 0.004105          | 0.003927 | 0.003967 | 0.00121           | 0.001855 | 0.002274 | 0.002222          | 0.004387 | 0.006603 |
| Slope             | 0.2706            | 0.3963   | 0.3189   | 0.269             | 0.4591  | 0.4261   | 0.2534              | 0.2433   | 0.4253   | 0.1926            | 0.1804   | 0.157    | 0.3358            | 0.3692   | 0.3331   | 0.3216            | 0.2981   | 0.4167   |
| Y-intercept       | 0.2642            | 0.01876  | 0.1181   | 0.2847            | -0.1011 | -0.07247 | 0.304               | 0.3125   | -0.134   | 0.4256            | 0.4624   | 0.4105   | 0.1438            | 0.07117  | 0.1206   | 0.1811            | 0.2091   | -0.03382 |
| X-intercept       | -0.9766           | -0.04734 | -0.3704  | -1.059            | 0.2203  | 0.1701   | -1.2                | -1.284   | 0.3152   | -2.21             | -2.563   | -2.615   | -0.4281           | -0.1928  | -0.3622  | -0.5632           | -0.7013  | 0.08114  |
| 1/slope           | 3.696             | 2.524    | 3.136    | 3.717             | 2.178   | 2.347    | 3.946               | 4.11     | 2.351    | 5.193             | 5.543    | 6.37     | 2.978             | 2.709    | 3.002    | 3.11              | 3.355    | 2.4      |
| Slope SE          | 0.02136           | 0.02533  | 0.02316  | 0.01654           | 0.02759 | 0.01839  | 0.0219              | 0.02552  | 0.03393  | 0.05614           | 0.03545  | 0.0168   | 0.01278           | 0.0214   | 0.02433  | 0.02353           | 0.044    | 0.06117  |
| Y-intercept SE    | 0.04295           | 0.05216  | 0.04657  | 0.0342            | 0.05723 | 0.03568  | 0.04513             | 0.05284  | 0.0638   | 0.1162            | 0.07276  | 0.03397  | 0.02613           | 0.04293  | 0.04828  | 0.04931           | 0.08947  | 0.1258   |
| percentage length |                   |          | 94       |                   |         | 91       |                     |          | 85       |                   |          | 88       |                   |          | 94       |                   |          | 96       |

**Supplemental Table 6.** Thin filament length (descriptive statistics)



| logFC          | <i>neb</i> <sup>15</sup> | <i>neb</i> <sup>11</sup> | <i>neb</i> <sup>hu28</sup> | <i>neb</i> <sup>34</sup> | <i>neb</i> <sup>21</sup> | <i>neb</i> <sup>30</sup> |
|----------------|--------------------------|--------------------------|----------------------------|--------------------------|--------------------------|--------------------------|
| <b>neb</b>     | -3.358                   | -3.439                   | -4.372                     | 0.210                    | 0.707                    | -0.048                   |
| <b>acta1b</b>  | -1.934                   | -2.474                   | -3.109                     | -1.490                   | -2.047                   | -0.681                   |
| <b>klhl38b</b> | -0.036                   | -0.036                   | -2.779                     | -0.735                   | -0.281                   | -1.391                   |
| <b>ankrd1b</b> | 0.296                    | -0.488                   | -2.659                     | 0.083                    | 0.203                    | 0.032                    |
| <b>actc1b</b>  | -0.899                   | -1.228                   | -2.162                     | -0.929                   | -1.198                   | -0.594                   |
| <b>acta1a</b>  | -1.499                   | -1.584                   | -1.730                     | -1.527                   | 0.275                    | -0.307                   |
| <b>tnnt1</b>   | -0.707                   | -0.638                   | -1.340                     | -0.623                   | 0.053                    | 0.524                    |
| <b>tpma</b>    | -0.071                   | -0.329                   | -1.230                     | -0.353                   | -0.304                   | -0.009                   |
| <b>lmod3</b>   | 0.174                    | -0.164                   | -0.488                     | -0.461                   | -0.037                   | 0.049                    |
| <b>cfl2</b>    | 0.237                    | -0.154                   | -0.440                     | -0.290                   | -0.275                   | -0.042                   |
| <b>tpm2</b>    | -0.530                   | -0.508                   | -0.388                     | -0.181                   | -0.154                   | 0.093                    |
| <b>klhl41b</b> | 0.258                    | -0.015                   | -0.360                     | -0.300                   | -0.206                   | 0.020                    |
| <b>kbtbd13</b> | -0.410                   | -0.194                   | -0.301                     | -0.127                   |                          | 0.541                    |
| <b>tpm3</b>    | -0.392                   | -0.367                   | -0.038                     | -0.064                   | -0.099                   | -0.039                   |
| <b>klhl40a</b> | 0.669                    | 0.193                    | 0.201                      | -0.100                   | -0.176                   | 0.328                    |
| <b>klhl41a</b> | 0.172                    | 0.131                    | 0.663                      | 0.247                    | -1.191                   | -0.226                   |
| <b>klhl40b</b> | 1.193                    | 0.111                    | 1.292                      | 0.059                    | 0.124                    | 0.340                    |
| <b>tmod1</b>   | -0.409                   | -0.640                   | 1.493                      | -0.271                   | -0.951                   | 0.107                    |

**Supplemental Table 7.** Nematine myopathy genes

| logFC      | neb <sup>15</sup> | neb <sup>11</sup> | neb <sup>hu28</sup> | neb <sup>34</sup> | neb <sup>21</sup> | neb <sup>30</sup> |
|------------|-------------------|-------------------|---------------------|-------------------|-------------------|-------------------|
| acta2      | -1.006            | -0.297            | -1.169              | -0.798            | -0.158            | -0.392            |
| actb1      | -0.170            | 0.052             | 0.502               | 0.142             | -0.076            | 0.000             |
| actc1a     | -0.424            | -0.576            | -0.655              | -0.381            | -0.148            | 0.088             |
| actc1c     | -4.660            | -4.045            | -2.981              | -2.327            | -0.565            | -0.526            |
| actn3a     | 0.132             | -0.123            | -0.874              | -0.118            | -0.086            | 0.198             |
| atp2a2a    | -1.849            | -1.659            | -0.996              | -0.685            | -0.333            | -0.849            |
| capza1a    | -0.019            | 0.173             | 0.592               | 0.070             | 0.401             | -0.004            |
| capza1b    | -0.277            | -0.485            | -0.752              | -0.510            | -0.461            | -0.091            |
| capza1b    | -0.277            | -0.485            | -0.752              | -0.510            | -0.461            | -0.091            |
| capzb      | -0.390            | -0.496            | -0.423              | -0.365            | -0.775            | -0.056            |
| desmb      | -1.506            | -0.510            | -1.688              | -1.162            | -0.987            | -0.386            |
| jph1b      | -0.167            | -0.179            | -0.762              | -0.158            | -0.242            | 0.111             |
| kbtbd12    | 0.101             | 0.061             | -0.691              | -0.234            | -0.181            | -0.001            |
| khl31      | -0.523            | -0.494            | -1.264              | -0.962            | -0.765            | -0.339            |
| lmod1a     | 0.496             | 0.198             | -0.256              | -0.506            | 0.166             | -0.266            |
| lmod1b     | 0.195             | -0.256            | -0.410              | 0.047             | 1.056             | 1.142             |
| lmod2b     | 0.071             | 0.542             | -0.587              | -0.418            | 0.204             | 0.068             |
| mustn1a    | -0.319            | -0.330            | -0.888              | -0.299            | -0.295            | 0.053             |
| mustn1b    | 3.043             | 1.950             | 1.360               | 1.175             | 2.238             | 1.554             |
| mybpct1    | -0.304            | -0.432            | -1.204              | -0.167            | 0.155             | 0.384             |
| mybphb     | 0.064             | -0.278            | -1.107              | -0.269            | -0.281            | -0.007            |
| myh11a     | -1.111            | -0.448            | -0.909              | -0.421            | -0.605            | -0.167            |
| myh7       | 0.104             | 0.057             | -0.656              | -0.029            | -0.207            | 0.066             |
| myha       | 0.338             | -0.857            | -2.055              | -1.225            | -0.164            | -0.165            |
| myhc4      | -0.226            | -1.313            | -1.263              | -1.220            | -1.160            | -0.704            |
| myhz1.1    | -0.069            | -0.465            | -1.321              | -0.422            | -0.354            | 1.462             |
| myhz1.2    | -0.275            | -0.725            | -1.238              | -0.340            | -0.521            | 0.013             |
| myhz1.3    | -0.552            | -1.112            | -2.482              | -0.903            | -1.220            | -0.429            |
| myhz2      | -0.373            | -1.262            | -1.748              | -0.798            | -0.931            | -0.783            |
| myl1       | 0.034             | -0.327            | -1.033              | -0.610            | -0.809            | -0.105            |
| myl12.1    | 0.040             | 0.179             | 0.811               | 0.173             | -0.059            | -0.125            |
| myl13      | -0.374            | -0.609            | -0.917              | -0.238            | 0.008             | -0.080            |
| mylk4a     | 0.550             | -0.068            | -0.703              | 0.236             | -1.269            | 0.291             |
| mylpfa     | -0.078            | -0.607            | -1.688              | -0.356            | -0.484            | -0.120            |
| mylpfb     | 0.147             | -0.204            | -1.290              | -0.119            | -0.312            | -0.067            |
| mylz3      | -0.218            | -0.734            | -1.764              | -0.464            | -0.369            | -0.109            |
| myo1b      | -0.985            | -0.368            | -0.845              | -0.091            | -0.763            | -0.025            |
| myo7bb     | -1.606            | -0.354            | -1.332              | -0.115            | -2.245            | -0.144            |
| myod1      | 1.218             | 0.440             | -0.869              | 0.648             | 0.439             | 0.481             |
| myom1a     | 0.127             | -0.213            | -0.695              | -0.200            | -0.125            | 0.142             |
| myom2a     | 0.105             | -0.152            | -0.717              | -0.247            | -0.187            | 0.084             |
| myoz1a     | -0.194            | -0.309            | -1.003              | -0.204            | -0.491            | 0.021             |
| myoz1b     | 0.413             | 0.160             | -0.854              | 0.005             | 0.107             | 0.249             |
| myoz2a     | 0.166             | 0.036             | -1.124              | -0.117            | 0.007             | 0.422             |
| palld      | 0.057             | -0.062            | 0.073               | -0.492            | -0.201            | -0.302            |
| pblid2     | -0.732            | -0.845            | -1.313              | -0.642            | -0.673            | -0.271            |
| pvalb1     | 0.135             | -0.276            | -1.695              | -0.230            | 0.360             | 0.249             |
| pvalb2     | 0.128             | -0.272            | -1.478              | -0.282            | -0.199            | -0.012            |
| pvalb3     | -0.698            | -1.101            | -1.353              | -0.613            | -0.375            | 0.739             |
| pvalb4     | -0.529            | -0.631            | -1.634              | -0.379            | -0.082            | 0.043             |
| ryr3       | 0.142             | -0.213            | -1.016              | -0.263            | 0.136             | 0.287             |
| tmod2      | -0.110            | -0.192            | 0.912               | -0.064            | -0.287            | -0.156            |
| tmod4      | 0.284             | 0.130             | -0.934              | -0.013            | -0.068            | 0.048             |
| tnnc2      | -0.064            | -0.394            | -1.188              | -0.315            | -0.255            | 0.037             |
| tnni1b     | 0.429             | 0.330             | 0.670               | 0.455             | 0.552             | 0.773             |
| tnni1c     | -1.304            | -0.907            | -0.580              | -0.439            | -0.334            | -0.207            |
| tnni1d     | 0.423             | 0.412             | -1.254              | 0.561             | 0.000             | 0.583             |
| tnni2a.2   | -0.968            |                   | -1.217              | -1.052            |                   | 1.263             |
| tnni2a.3   | -0.839            |                   | -1.724              | -0.577            | 0.505             | 1.692             |
| tnni2a.4   | -0.029            | -0.364            | -1.180              | -0.377            | -0.312            | -0.063            |
| tnni2b.1   | 0.282             | 0.446             | 0.846               | 0.404             | 0.674             | 0.760             |
| tnni2b.2   | -0.053            | 0.557             | -0.380              | 0.076             | 0.492             | 0.196             |
| tnni4a     | 0.569             | 0.473             | 0.215               | 0.526             | -0.029            | 0.313             |
| tnni4b.1   | -3.747            | -1.566            | -3.437              | -1.294            | -0.287            | -1.114            |
| tnni4b.2   | -0.395            | -0.545            | -1.063              | -0.234            | 0.189             | -0.041            |
| tnnt2b     | 0.262             | 0.006             | -1.107              | 0.191             | -0.003            | 0.645             |
| tnnt2c     | 1.392             | 0.731             | 1.190               | 1.498             | -0.174            | 0.974             |
| tnnt2d     | -0.903            | -0.751            | -1.011              | -0.289            | -0.463            | -0.272            |
| tnnt2e     | 0.173             | -0.027            | 0.120               | 0.045             | 0.179             | 0.061             |
| tnnt3a     | -0.035            | -0.485            | -0.023              | -0.293            | 0.106             | 0.304             |
| tnnt3b     | -0.014            | -0.305            | -1.209              | -0.264            | -0.289            | 0.101             |
| tpm1       | -0.561            | -0.340            | -0.360              | -0.372            | -0.128            | 0.081             |
| tpm4a      | -0.215            | -0.303            | 0.501               | -0.018            | -0.312            | 0.402             |
| tpm4b      | 0.204             | -0.322            | 0.595               | 0.318             | -0.131            | 0.759             |
| trim109    | 0.378             | -0.329            | -0.534              | -0.391            | 0.410             | -0.076            |
| trim63a    | 0.018             | -0.105            | -1.818              | -0.894            | -0.241            | -1.271            |
| trim63b    | 0.527             | 0.087             | -1.333              | -0.524            | 0.469             | -0.511            |
| ttn.1      | 0.090             | -0.466            | -1.596              | 0.114             | -0.289            | 0.309             |
| ttn.2      | 0.170             | -0.462            | -1.530              | 0.174             | 0.261             | 0.348             |
| twf2a      | 0.729             | 0.373             | -1.126              | -0.105            | 0.086             | -0.309            |
| ucmab      | -1.643            | -0.781            | -1.165              | -1.201            | 0.641             | -1.539            |
| wasb       | 0.205             | -0.415            | -1.629              | -0.400            | 0.211             | -0.325            |
| xirp1      | 1.070             | 0.364             | 0.930               | 0.019             | 1.157             | 0.870             |
| xirp2a     | 0.439             | -0.093            | 0.485               | -0.020            | 0.203             | 0.526             |
| xirp2b     | -0.265            | -0.240            | 0.445               | -0.509            | -0.970            | 0.461             |
| zgc:153867 | 0.015             | 0.160             | 0.509               | 0.162             | 0.248             | 0.156             |
| zyx        | -0.717            | -0.172            | 1.389               | -0.311            | 0.015             | -0.677            |

Supplemental Table 8. Muscle relevant genes
