# Supplementary material for: Comprehensive phenotypic characterization of an allelic series of zebrafish models of NEB-related nemaline myopathy
Source: PubMed Central journal article supplement (PMC11153343; doi:10.1093/hmg/ddae033), 2024-03-17
Supplement: supplemental_table_1_ddae033.pdf [file supplemental_table_1_ddae033.pdf]

|            |             | average intensity |                   |                   |
|------------|-------------|-------------------|-------------------|-------------------|
|            |             | wt                | neb <sup>34</sup> | neb <sup>30</sup> |
| myofiber 1 | sarcomere 1 | 98.56             | 63.04             | 76.45             |
|            | sarcomere 2 | 93.68             | 74.53             | 81.94             |
|            | sarcomere 3 | 92.51             | 57.96             | 83.18             |
|            | sarcomere 4 | 102.43            | 56.73             | 84.25             |
|            | sarcomere 5 | 95.59             | 53.5              | 79.74             |
|            | sarcomere 6 | 82.39             | 56.92             | 90.53             |
|            | sarcomere 7 | 93.1              | 48.27             | 88.34             |
|            | sarcomere 8 | 94.42             | 66.82             | 85.88             |
| myofiber 2 | sarcomere 1 | 99.48             | 28.43             | 76.55             |
|            | sarcomere 2 | 101.39            | 28.81             | 82.32             |
|            | sarcomere 3 | 100.7             | 31.13             | 78.41             |
|            | sarcomere 4 | 100.69            | 30.44             | 83.65             |
|            | sarcomere 5 | 102.67            | 40.1              | 78.73             |
|            | sarcomere 6 | 102.37            | 38.77             | 68.66             |
|            | sarcomere 7 | 99.62             | 46.18             | 75.8              |
|            | sarcomere 8 | 97.38             | 50                | 80.06             |
| myofiber 3 | sarcomere 1 | 81.45             | 69.41             | 79.83             |
|            | sarcomere 2 | 84.21             | 55.46             | 76.65             |
|            | sarcomere 3 | 87.75             | 60.86             | 81.69             |
|            | sarcomere 4 | 86.28             | 52.61             | 74.99             |
|            | sarcomere 5 | 84.55             | 64.06             | 81.77             |
|            | sarcomere 6 | 83.18             | 67.29             | 79.36             |
|            | sarcomere 7 | 81.97             | 56.42             | 89.55             |
|            | sarcomere 8 | 87.36             | 65.69             | 88.94             |
| myofiber 4 | sarcomere 1 | 98.25             | 66.75             | 95.15             |
|            | sarcomere 2 | 98.25             | 72.83             | 89.8              |
|            | sarcomere 3 | 101.19            | 63.06             | 90.68             |
|            | sarcomere 4 | 101.97            | 59.49             | 98.87             |
|            | sarcomere 5 | 91.08             | 52.57             | 83.2              |
|            | sarcomere 6 | 94.13             | 49.74             | 96.87             |
|            | sarcomere 7 | 86.66             | 64.24             | 94.22             |
|            | sarcomere 8 | 101.59            | 66.88             | 87.53             |
| myofiber 5 | sarcomere 1 | 64.91             | 60.81             | 63.64             |
|            | sarcomere 2 | 75.93             | 57.98             | 57.92             |
|            | sarcomere 3 | 87.11             | 50.26             | 64.47             |
|            | sarcomere 4 | 87.89             | 63.28             | 68.14             |
|            | sarcomere 5 | 84.3              | 61.16             | 71.43             |
|            | sarcomere 6 | 81.06             | 52.73             | 67.14             |
|            | sarcomere 7 | 81.36             | 63.37             | 68.84             |
|            | sarcomere 8 | 80.22             | 56.03             | 69.67             |
| myofiber 6 | sarcomere 1 | 102.59            | 51.53             | 102.66            |
|            | sarcomere 2 | 101.59            | 50.6              | 102.64            |
|            | sarcomere 3 | 96.81             | 41.33             | 102.67            |
|            | sarcomere 4 | 101.62            | 33.43             | 102.67            |
|            | sarcomere 5 | 100.74            | 36.89             | 102.67            |
|            | sarcomere 6 | 101.16            | 48.13             | 102.67            |
|            | sarcomere 7 | 98.55             | 46.92             | 102.67            |
|            | sarcomere 8 | 98.7              | 41.62             | 102.67            |
| myofiber 7 | sarcomere 1 | 99.89             | 48.47             | 102.67            |
|            | sarcomere 2 | 97.5              | 52.08             | 102.67            |
|            | sarcomere 3 | 98.96             | 51.91             | 102.67            |
|            | sarcomere 4 | 98.67             | 51.74             | 102.67            |
|            | sarcomere 5 | 102.54            | 51.56             | 102.67            |
|            | sarcomere 6 | 95.51             | 39.2              | 102.67            |
|            | sarcomere 7 | 96.45             | 46.14             | 102.67            |
|            | sarcomere 8 | 97.93             | 44.58             | 102.67            |
| n          |             | 56                | 56                | 56                |
| Mean       |             | 93.55             | 52.87             | 86.74             |
| SEM        |             | 1.139             | 1.509             | 1.736             |
| %          |             |                   | 56.50%            | 92.70%            |

**Supplemental Table 1.** Average fluorescence intensity measurements of anti Neb-N antibody staining in myofiber preparations and descriptive statistics
