# Supplementary material for: Comprehensive phenotypic characterization of an allelic series of zebrafish models of NEB-related nemaline myopathy
Source: PubMed Central journal article supplement (PMC11153343; doi:10.1093/hmg/ddae033), 2024-03-17
Supplement: supplemental_table_2_ddae033.pdf [file supplemental_table_2_ddae033.pdf]

|               |        | wt         |                   | neb <sup>15</sup> |                   | neb <sup>11</sup> |                   | neb <sup>34</sup> |                   | neb <sup>21</sup> |                   | neb <sup>30</sup> |                   |
|---------------|--------|------------|-------------------|-------------------|-------------------|-------------------|-------------------|-------------------|-------------------|-------------------|-------------------|-------------------|-------------------|
|               |        | n (pixels) | average intensity | n (pixels)        | average intensity | n (pixels)        | average intensity | n (pixels)        | average intensity | n (pixels)        | average intensity | n (pixels)        | average intensity |
| measurement 1 | fish 1 | 148        | 254.40            | 145               | 156.28            | 184               | 174.32            | 138               | 165.56            | 168               | 136.39            | 117               | 255.00            |
|               | fish 2 | 147        | 254.92            | 156               | 97.59             | 145               | 113.32            | 175               | 210.39            | 183               | 81.21             | 121               | 251.45            |
|               | fish 3 | 135        | 255.00            | 146               | 124.93            | 122               | 35.39             | 160               | 153.63            | 147               | 154.28            | 117               | 253.10            |
|               | fish 4 | 124        | 255.00            | 131               | 175.58            | 147               | 100.64            | 157               | 174.27            | 147               | 43.17             | 124               | 255.00            |
|               | fish 5 | 135        | 255.00            | 150               | 159.04            | 121               | 120.42            | 164               | 186.36            | 154               | 58.03             | 142               | 255.00            |
|               | fish 6 | 169        | 250.24            |                   |                   |                   |                   |                   |                   |                   |                   |                   |                   |
|               | fish 7 | 140        | 255.00            |                   |                   |                   |                   |                   |                   |                   |                   |                   |                   |
|               | fish 8 | 158        | 255.00            |                   |                   |                   |                   |                   |                   |                   |                   |                   |                   |
| measurement 2 | fish 1 | 142        | 254.97            | 143               | 194.88            | 156               | 233.27            | 144               | 201.54            | 121               | 187.05            | 255.00            | 255.00            |
|               | fish 2 | 122        | 255.00            | 135               | 181.41            | 132               | 187.08            | 145               | 234.83            | 180               | 161.42            | 255.00            | 255.00            |
|               | fish 3 | 111        | 254.94            | 132               | 189.16            | 99                | 61.12             | 137               | 221.50            | 136               | 231.19            | 254.77            | 254.77            |
|               | fish 4 | 120        | 254.95            | 117               | 234.72            | 155               | 44.15             | 132               | 206.52            | 125               | 85.69             | 255.00            | 255.00            |
|               | fish 5 | 110        | 255.00            | 145               | 216.88            | 132               | 154.34            | 148               | 231.09            | 150               | 153.58            | 255.00            | 255.00            |
|               | fish 6 | 153        | 254.62            |                   |                   |                   |                   |                   |                   |                   |                   |                   |                   |
|               | fish 7 | 123        | 255.00            |                   |                   |                   |                   |                   |                   |                   |                   |                   |                   |
|               | fish 8 | 151        | 255.00            |                   |                   |                   |                   |                   |                   |                   |                   |                   |                   |
| <b>n</b>      |        | 16         |                   | 10                |                   | 10                |                   | 10                |                   | 10                |                   | 10                |                   |
| <b>Mean</b>   |        | 254.6      |                   | 122.4             |                   | 173               |                   | 198.6             |                   | 129.2             |                   | 254.4             |                   |
| <b>SEM</b>    |        | 0.2955     |                   | 20.6              |                   | 12.92             |                   | 8.793             |                   | 19.07             |                   | 0.3806            |                   |

**Supplemental Table 2.** Average birefringence intensity measurements (grey scale value) and descriptive statistics.
