# Supplementary material for: Comprehensive phenotypic characterization of an allelic series of zebrafish models of NEB-related nemaline myopathy
Source: PubMed Central journal article supplement (PMC11153343; doi:10.1093/hmg/ddae033), 2024-03-17
Supplement: supplemental_table_3_ddae033.pdf [file supplemental_table_3_ddae033.pdf]

| zebrafish line            | neb <sup>15</sup> |            |            | neb <sup>11</sup> |            |            | neb <sup>34</sup> |            |            | neb <sup>21</sup> |            |            | neb <sup>30</sup> |            |            |
|---------------------------|-------------------|------------|------------|-------------------|------------|------------|-------------------|------------|------------|-------------------|------------|------------|-------------------|------------|------------|
| <b>recorded values</b>    |                   |            |            |                   |            |            |                   |            |            |                   |            |            |                   |            |            |
| <b>time spent moving</b>  | <b>wt</b>         | <b>het</b> | <b>mut</b> | <b>wt</b>         | <b>het</b> | <b>mut</b> | <b>wt</b>         | <b>het</b> | <b>mut</b> | <b>wt</b>         | <b>het</b> | <b>mut</b> | <b>wt</b>         | <b>het</b> | <b>mut</b> |
| n                         | 11                | 14         | 12         | 9                 | 24         | 21         | 12                | 11         | 23         | 9                 | 17         | 8          | 13                | 19         | 16         |
| mean                      | 145.50            | 142.50     | 92.00      | 130.33            | 117.07     | 93.47      | 153.70            | 170.70     | 131.90     | 164.10            | 150.30     | 129.20     | 140.20            | 114.90     | 137.50     |
| SEM                       | 10.77             | 8.75       | 4.45       | 11.29             | 6.00       | 5.55       | 11.39             | 10.64      | 7.13       | 9.18              | 8.32       | 12.57      | 13.16             | 8.43       | 9.45       |
| <b>distance travelled</b> | <b>wt</b>         | <b>het</b> | <b>mut</b> | <b>wt</b>         | <b>het</b> | <b>mut</b> | <b>wt</b>         | <b>het</b> | <b>mut</b> | <b>wt</b>         | <b>het</b> | <b>mut</b> | <b>wt</b>         | <b>het</b> | <b>mut</b> |
| n                         | 11                | 14         | 12         | 9                 | 24         | 21         | 12                | 11         | 23         | 9                 | 17         | 8          | 13                | 19         | 16         |
| mean                      | 386.60            | 386.20     | 167.80     | 360.50            | 337.80     | 230.00     | 428.60            | 447.00     | 304.00     | 367.90            | 389.80     | 300.90     | 347.10            | 301.90     | 353.40     |
| SEM                       | 33.34             | 23.85      | 9.48       | 30.11             | 15.24      | 13.49      | 23.78             | 25.77      | 16.21      | 27.36             | 22.01      | 39.01      | 32.59             | 28.66      | 23.79      |
| % change                  |                   |            | 43.40      |                   |            | 63.80      |                   |            | 70.93      |                   |            | 81.79      |                   |            | 101.82     |
| <b>average speed</b>      | <b>wt</b>         | <b>het</b> | <b>mut</b> | <b>wt</b>         | <b>het</b> | <b>mut</b> | <b>wt</b>         | <b>het</b> | <b>mut</b> | <b>wt</b>         | <b>het</b> | <b>mut</b> | <b>wt</b>         | <b>het</b> | <b>mut</b> |
| n                         | 11                | 14         | 12         | 9                 | 24         | 21         | 12                | 11         | 23         | 9                 | 17         | 8          | 13                | 19         | 16         |
| mean                      | 2.64              | 2.75       | 1.84       | 2.85              | 2.98       | 2.50       | 2.92              | 2.66       | 2.38       | 2.27              | 2.65       | 2.29       | 2.53              | 2.64       | 2.62       |
| SEM                       | 0.12              | 0.14       | 0.08       | 0.19              | 0.14       | 0.12       | 0.21              | 0.12       | 0.15       | 0.17              | 0.14       | 0.18       | 0.17              | 0.22       | 0.14       |
| <b>normalized values</b>  |                   |            |            |                   |            |            |                   |            |            |                   |            |            |                   |            |            |
| <b>time spent moving</b>  | <b>wt</b>         | <b>het</b> | <b>mut</b> | <b>wt</b>         | <b>het</b> | <b>mut</b> | <b>wt</b>         | <b>het</b> | <b>mut</b> | <b>wt</b>         | <b>het</b> | <b>mut</b> | <b>wt</b>         | <b>het</b> | <b>mut</b> |
| n                         | 11                | 14         | 12         | 9                 | 24         | 21         | 12                | 11         | 23         | 9                 | 17         | 8          | 13                | 19         | 16         |
| mean                      | 1.00              | 0.98       | 0.63       | 1.00              | 0.90       | 0.72       | 1.00              | 1.11       | 0.86       | 1.00              | 0.92       | 0.79       | 1.00              | 0.82       | 0.98       |
| SEM                       | 0.07              | 0.06       | 0.03       | 0.09              | 0.05       | 0.04       | 0.07              | 0.07       | 0.05       | 0.06              | 0.05       | 0.08       | 0.09              | 0.06       | 0.07       |
| <b>distance travelled</b> | <b>wt</b>         | <b>het</b> | <b>mut</b> | <b>wt</b>         | <b>het</b> | <b>mut</b> | <b>wt</b>         | <b>het</b> | <b>mut</b> | <b>wt</b>         | <b>het</b> | <b>mut</b> | <b>wt</b>         | <b>het</b> | <b>mut</b> |
| n                         | 11                | 14         | 12         | 9                 | 24         | 21         | 12                | 11         | 23         | 9                 | 17         | 8          | 13                | 19         | 16         |
| mean                      | 1.00              | 1.00       | 0.43       | 1.00              | 0.94       | 0.64       | 1.00              | 1.04       | 0.71       | 1.00              | 1.06       | 0.82       | 1.00              | 0.87       | 1.02       |
| SEM                       | 0.09              | 0.06       | 0.02       | 0.08              | 0.04       | 0.04       | 0.06              | 0.06       | 0.04       | 0.07              | 0.06       | 0.11       | 0.09              | 0.08       | 0.07       |
| <b>average speed</b>      | <b>wt</b>         | <b>het</b> | <b>mut</b> | <b>wt</b>         | <b>het</b> | <b>mut</b> | <b>wt</b>         | <b>het</b> | <b>mut</b> | <b>wt</b>         | <b>het</b> | <b>mut</b> | <b>wt</b>         | <b>het</b> | <b>mut</b> |
| n                         | 11                | 14         | 12         | 9                 | 24         | 21         | 12                | 11         | 23         | 9                 | 17         | 8          | 13                | 19         | 16         |
| mean                      | 1.00              | 1.04       | 0.70       | 1.00              | 1.05       | 0.88       | 1.00              | 0.91       | 0.81       | 1.00              | 1.17       | 1.01       | 1.00              | 1.05       | 1.04       |
| SEM                       | 0.05              | 0.05       | 0.03       | 0.07              | 0.05       | 0.04       | 0.07              | 0.04       | 0.05       | 0.08              | 0.06       | 0.08       | 0.07              | 0.09       | 0.06       |

**Supplemental Table 3.** Descriptive statistics for swim assay measurements (recorded and normalized values for time spent moving, distance travelled, average speed)
