# Supplementary material for: Comprehensive phenotypic characterization of an allelic series of zebrafish models of NEB-related nemaline myopathy
Source: PubMed Central journal article supplement (PMC11153343; doi:10.1093/hmg/ddae033), 2024-03-17
Supplement: supplemental_table_4_ddae033.pdf [file supplemental_table_4_ddae033.pdf]

| Frequency      | 1Hz   | 5 Hz  | 10 Hz | 20 Hz | 40 Hz | 60 Hz | 80 Hz | 100 Hz | 150 Hz | 200 Hz | 1Hz                                                  | 5 Hz  | 10 Hz | 20 Hz | 40 Hz | 60 Hz | 80 Hz | 100 Hz | 150 Hz | 200 Hz |
|----------------|-------|-------|-------|-------|-------|-------|-------|--------|--------|--------|------------------------------------------------------|-------|-------|-------|-------|-------|-------|--------|--------|--------|
| neb15 wt sib   |       |       |       |       |       |       |       |        |        |        | neb15 mut                                            |       |       |       |       |       |       |        |        |        |
|                | 8.45  | 8.17  | 7.98  | 7.88  | 8.02  | 7.58  | 7.25  | 7.42   | 11.96  | 16.27  | 5.52                                                 | 5.25  | 5.30  | 5.38  | 5.44  | 5.34  | 7.94  | 9.94   | 13.62  | 15.40  |
|                | 34.62 | 33.69 | 33.79 | 32.31 | 33.30 | 32.67 | 31.74 | 30.85  | 37.29  | 47.45  | 1.81                                                 | 1.84  | 1.89  | 1.86  | 2.84  | 4.34  | 6.32  | 8.10   | 12.68  | 13.14  |
|                | 16.47 | 16.24 | 16.70 | 16.45 | 17.82 | 17.48 | 17.61 | 17.30  | 28.55  | 37.23  | 1.84                                                 | 1.81  | 1.58  | 1.83  | 2.63  | 4.17  | 6.68  | 7.70   | 9.12   | 10.38  |
|                | 6.04  | 6.27  | 6.41  | 6.43  | 6.63  | 6.40  | 6.94  | 10.15  | 18.33  | 24.37  | 1.87                                                 | 2.01  | 1.90  | 2.04  | 2.07  | 3.05  | 5.32  | 6.86   | 9.19   | 10.46  |
|                | 13.43 | 12.89 | 13.15 | 13.39 | 13.24 | 12.81 | 12.95 | 15.76  | 30.95  | 40.40  | 2.50                                                 | 2.42  | 2.64  | 2.76  | 3.49  | 5.30  | 8.39  | 11.30  | 14.95  | 16.88  |
| n              | 5     | 5     | 5     | 5     | 5     | 5     | 5     | 5      | 5      | 5      | 0.79                                                 | 1.08  | 1.15  | 0.94  | 1.22  | 1.65  | 2.37  | 3.12   | 4.60   | 5.14   |
| Mean           | 15.80 | 15.45 | 15.61 | 15.29 | 15.80 | 15.39 | 15.30 | 16.30  | 25.42  | 33.15  | 2.18                                                 | 2.21  | 2.21  | 2.26  | 2.67  | 3.57  | 5.51  | 7.00   | 9.65   | 10.78  |
| SEM            | 11.29 | 10.92 | 10.96 | 10.35 | 10.74 | 10.63 | 10.20 | 9.08   | 10.16  | 12.61  | 1.59                                                 | 1.42  | 1.47  | 1.51  | 1.51  | 1.68  | 2.63  | 3.39   | 4.44   | 4.85   |
| SD             | 5.05  | 4.88  | 4.90  | 4.63  | 4.80  | 4.75  | 4.56  | 4.06   | 4.54   | 5.64   | 0.60                                                 | 0.54  | 0.55  | 0.57  | 0.57  | 0.63  | 0.99  | 1.28   | 1.68   | 1.83   |
|                |       |       |       |       |       |       |       |        |        |        | percentage force at 200 Hz (compared to wt siblings) |       |       |       |       |       |       |        |        |        |
|                |       |       |       |       |       |       |       |        |        |        | 33                                                   |       |       |       |       |       |       |        |        |        |
| neb11 wt sib   |       |       |       |       |       |       |       |        |        |        | neb11 mut                                            |       |       |       |       |       |       |        |        |        |
|                | 31.11 | 31.01 | 29.15 | 27.40 | 27.58 | 25.28 | 24.70 | 23.68  | 25.65  | 26.09  | 2.98                                                 | 2.99  | 2.99  | 2.93  | 2.90  | 2.83  | 2.62  | 3.02   | 5.05   | 5.94   |
|                | 24.05 | 24.04 | 23.45 | 23.66 | 22.81 | 22.76 | 23.78 | 24.63  | 25.95  | 26.68  | 0.96                                                 | 0.80  | 0.88  | 0.79  | 0.86  | 0.94  | 0.84  | 0.92   | 1.03   | 1.57   |
|                | 32.93 | 32.74 | 30.62 | 31.66 | 29.72 | 29.04 | 27.95 | 26.77  | 30.17  | 30.43  | 4.81                                                 | 4.87  | 4.71  | 4.73  | 4.82  | 5.73  | 5.70  | 5.62   | 6.30   | 5.94   |
|                |       |       |       |       |       |       |       |        |        |        | 5.22                                                 | 5.21  | 4.93  | 4.95  | 5.01  | 5.63  | 5.82  | 5.95   | 6.93   | 6.59   |
| n              | 3     | 3     | 3     | 3     | 3     | 3     | 3     | 3      | 3      | 3      | 4                                                    | 4     | 4     | 4     | 4     | 4     | 4     | 4      | 4      | 4      |
| Mean           | 29.36 | 29.26 | 27.74 | 27.57 | 26.70 | 25.69 | 25.47 | 25.03  | 27.26  | 27.73  | 3.49                                                 | 3.47  | 3.38  | 3.35  | 3.40  | 3.79  | 3.75  | 3.88   | 4.83   | 5.01   |
| SEM            | 2.71  | 2.66  | 2.19  | 2.31  | 2.04  | 1.83  | 1.27  | 0.91   | 1.46   | 1.36   | 1.95                                                 | 2.03  | 1.88  | 1.93  | 1.94  | 2.32  | 2.44  | 2.37   | 2.65   | 2.32   |
| SD             | 4.69  | 4.61  | 3.79  | 4.00  | 3.54  | 3.16  | 2.19  | 1.58   | 2.53   | 2.35   | 0.97                                                 | 1.02  | 0.94  | 0.97  | 0.97  | 1.16  | 1.22  | 1.18   | 1.33   | 1.16   |
|                |       |       |       |       |       |       |       |        |        |        | percentage force at 200 Hz (compared to wt siblings) |       |       |       |       |       |       |        |        |        |
|                |       |       |       |       |       |       |       |        |        |        | 18                                                   |       |       |       |       |       |       |        |        |        |
| nebhu28 wt sib |       |       |       |       |       |       |       |        |        |        | nebhu28 mut                                          |       |       |       |       |       |       |        |        |        |
|                | 20.14 | 18.52 | 17.76 | 17.61 | 16.21 | 16.15 | 16.10 | 14.98  | 18.61  | 21.15  | 2.04                                                 | 2.12  | 2.04  | 1.79  | 1.72  | 1.75  | 1.84  | 1.97   | 2.91   | 3.03   |
|                | 14.97 | 14.87 | 13.86 | 14.50 | 14.12 | 13.54 | 13.08 | 14.01  | 17.00  | 20.29  | 0.21                                                 | 0.20  | 0.24  | 0.23  | 0.19  | 0.18  | 0.20  | 0.20   | 0.27   | 0.27   |
|                | 16.89 | 15.70 | 16.30 | 15.96 | 15.43 | 15.21 | 15.77 | 16.79  | 18.44  | 20.52  | 0.88                                                 | 0.82  | 0.84  | 0.78  | 0.81  | 0.74  | 0.66  | 0.75   | 0.88   | 1.04   |
|                | 17.80 | 17.40 | 17.08 | 16.63 | 16.18 | 15.85 | 15.93 | 15.77  | 18.40  | 19.98  | 2.11                                                 | 2.20  | 2.05  | 2.00  | 1.96  | 1.97  | 1.89  | 1.94   | 2.80   | 3.37   |
|                | 11.60 | 11.71 | 11.48 | 11.80 | 10.31 | 9.00  | 8.66  | 7.79   | 8.33   | 9.58   | 0.54                                                 | 0.63  | 0.64  | 0.65  | 0.91  | 1.24  | 1.62  | 2.07   | 1.95   | 2.29   |
|                | 30.79 | 31.26 | 31.31 | 31.33 | 29.74 | 29.39 | 29.07 | 31.68  | 34.67  | 35.81  | 1.64                                                 | 1.68  | 1.55  | 1.61  | 1.56  | 1.60  | 2.40  | 2.67   | 3.77   | 3.99   |
|                | 28.84 | 27.89 | 28.38 | 31.06 | 25.58 | 26.38 | 26.27 | 26.27  | 32.97  | 28.74  | 1.79                                                 | 1.70  | 1.66  | 1.74  | 1.70  | 1.66  | 1.65  | 1.82   | 2.35   | 3.24   |
|                | 29.66 | 30.30 | 28.89 | 28.11 | 26.55 | 25.65 | 23.85 | 23.94  | 27.26  | 27.89  | 0.53                                                 | 0.53  | 0.54  | 0.52  | 0.54  | 0.48  | 0.61  | 0.72   | 1.10   | 1.08   |
|                | 34.81 | 34.98 | 33.75 | 33.16 | 32.39 | 31.72 | 30.49 | 29.84  | 35.67  | 36.42  | 5.19                                                 | 5.12  | 4.99  | 5.00  | 4.97  | 5.23  | 5.50  | 5.76   | 7.03   | 7.44   |
|                | 40.97 | 43.84 | 43.77 | 43.77 | 42.36 | 37.46 | 36.34 | 38.70  | 44.69  | 40.82  | 4.37                                                 | 4.54  | 4.33  | 4.50  | 4.67  | 5.05  | 4.99  | 5.18   | 6.00   | 6.35   |
|                |       |       |       |       |       |       |       |        |        |        | 7.12                                                 | 6.65  | 6.46  | 5.99  | 5.01  | 4.90  | 4.88  | 4.53   | 6.03   | 5.59   |
| n              | 10    | 10    | 10    | 10    | 10    | 10    | 10    | 10     | 10     | 10     | 0.34                                                 | 0.37  | 0.30  | 0.39  | 0.37  | 0.37  | 0.38  | 0.39   | 0.47   | 0.50   |
| Mean           | 24.65 | 24.64 | 24.26 | 24.39 | 22.89 | 22.03 | 21.56 | 21.98  | 25.60  | 26.12  | 12                                                   | 12    | 12    | 12    | 12    | 12    | 12    | 12     | 12     | 12     |
| SEM            | 9.67  | 10.51 | 10.47 | 10.50 | 10.10 | 9.31  | 8.92  | 9.64   | 11.20  | 9.59   | 2.23                                                 | 2.21  | 2.14  | 2.10  | 2.03  | 2.10  | 2.22  | 2.33   | 2.96   | 3.18   |
| SD             | 3.06  | 3.32  | 3.31  | 3.32  | 3.19  | 2.94  | 2.82  | 3.05   | 3.54   | 3.03   | 2.20                                                 | 2.11  | 2.04  | 1.97  | 1.81  | 1.88  | 1.88  | 1.88   | 2.31   | 2.34   |
|                |       |       |       |       |       |       |       |        |        |        | percentage force at 200 Hz (compared to wt siblings) |       |       |       |       |       |       |        |        |        |
|                |       |       |       |       |       |       |       |        |        |        | 12                                                   |       |       |       |       |       |       |        |        |        |
| neb34 wt sib   |       |       |       |       |       |       |       |        |        |        | neb34 mut                                            |       |       |       |       |       |       |        |        |        |
|                | 31.86 | 33.41 | 32.98 | 31.78 | 28.90 | 26.24 | 27.75 | 30.58  | 36.92  | 41.66  | 2.98                                                 | 2.99  | 2.99  | 2.93  | 2.90  | 2.83  | 2.62  | 3.02   | 5.05   | 5.94   |
|                | 42.32 | 39.69 | 39.27 | 37.10 | 35.02 | 34.56 | 34.67 | 35.11  | 40.83  | 42.17  | 13.82                                                | 13.97 | 13.62 | 13.98 | 13.85 | 14.11 | 14.70 | 17.00  | 19.74  | 19.99  |
|                | 29.12 | 28.32 | 27.24 | 26.51 | 25.58 | 25.21 | 24.29 | 24.59  | 28.68  | 28.96  | 10.37                                                | 10.53 | 9.82  | 9.78  | 9.17  | 8.78  | 8.80  | 9.44   | 10.95  | 12.61  |
|                | 6.49  | 10.66 | 11.92 | 11.97 | 11.10 | 9.15  | 8.91  | 8.89   | 10.59  | 13.18  | 8.53                                                 | 8.52  | 8.58  | 8.36  | 8.32  | 7.83  | 8.03  | 8.80   | 10.83  | 11.54  |
| n              | 4     | 4     | 4     | 4     | 4     | 4     | 4     | 4      | 4      | 4      | 7.09                                                 | 7.19  | 7.02  | 6.92  | 6.63  | 6.60  | 6.40  | 7.66   | 10.07  | 10.70  |
| Mean           | 27.45 | 28.02 | 27.85 | 26.84 | 25.15 | 23.79 | 23.90 | 24.79  | 29.25  | 31.49  | 5                                                    | 5     | 5     | 5     | 5     | 5     | 5     | 5      | 5      | 5      |
| SEM            | 15.09 | 12.47 | 11.70 | 10.82 | 10.15 | 10.62 | 10.89 | 11.44  | 13.43  | 13.65  | 8.56                                                 | 8.64  | 8.41  | 8.39  | 8.18  | 8.03  | 8.11  | 9.18   | 11.33  | 12.16  |
| SD             | 7.54  | 6.24  | 5.85  | 5.41  | 5.07  | 5.31  | 5.44  | 5.72   | 6.72   | 6.83   | 4.01                                                 | 4.07  | 3.89  | 4.03  | 3.98  | 4.08  | 4.39  | 5.04   | 5.30   | 5.07   |
|                |       |       |       |       |       |       |       |        |        |        | percentage force at 200 Hz (compared to wt siblings) |       |       |       |       |       |       |        |        |        |
|                |       |       |       |       |       |       |       |        |        |        | 39                                                   |       |       |       |       |       |       |        |        |        |
| neb21 wt sib   |       |       |       |       |       |       |       |        |        |        | neb21 mut                                            |       |       |       |       |       |       |        |        |        |
|                | 41.24 | 38.47 | 38.18 | 37.24 | 37.59 | 35.10 | 35.90 | 35.72  | 43.92  | 46.58  | 1.95                                                 | 2.36  | 2.54  | 3.20  | 4.45  | 5.36  | 6.78  | 7.58   | 8.52   | 8.28   |
|                | 6.15  | 6.04  | 5.91  | 6.67  | 9.58  | 11.45 | 13.84 | 15.04  | 17.99  | 17.89  | 7.20                                                 | 7.34  | 8.17  | 10.67 | 14.96 | 18.21 | 23.53 | 29.51  | 31.74  | 31.19  |
|                | 35.15 | 36.22 | 36.22 | 37.25 | 34.96 | 36.07 | 47.45 | 57.59  | 75.95  | 75.45  | 3.77                                                 | 4.06  | 5.00  | 6.31  | 8.20  | 10.47 | 13.45 | 14.76  | 16.88  | 15.76  |
|                | 23.06 | 22.81 | 22.16 | 21.85 | 22.33 | 22.52 | 24.57 | 29.44  | 29.93  | 31.62  | 7.96                                                 | 7.96  | 7.65  | 8.24  | 10.32 | 13.08 | 16.76 | 17.48  | 20.52  | 20.25  |
| n              | 4     | 4     | 4     | 4     | 4     | 4     | 4     | 4      | 4      | 4      | 4                                                    | 4     | 4     | 4     | 4     | 4     | 4     | 4      | 4      | 4      |
| Mean           | 26.40 | 25.89 | 25.62 | 25.75 | 26.11 | 26.28 | 30.44 | 34.45  | 41.95  | 42.88  | 5.22                                                 | 5.43  | 5.84  | 7.11  | 9.48  | 11.78 | 15.13 | 17.33  | 19.42  | 18.87  |
| SEM            | 15.47 | 14.93 | 14.95 | 14.64 | 12.88 | 11.66 | 14.48 | 17.69  | 25.02  | 24.67  | 2.84                                                 | 2.67  | 2.60  | 3.15  | 4.39  | 5.35  | 6.97  | 9.13   | 9.63   | 9.58   |
| SD             | 7.74  | 7.46  | 7.48  | 7.32  | 6.44  | 5.83  | 7.24  | 8.85   | 12.51  | 12.34  | 1.42                                                 | 1.33  | 1.30  | 1.58  | 2.19  | 2.68  | 3.49  | 4.56   | 4.82   | 4.79   |
|                |       |       |       |       |       |       |       |        |        |        | percentage force at 200 Hz (compared to wt siblings) |       |       |       |       |       |       |        |        |        |
|                |       |       |       |       |       |       |       |        |        |        | 44                                                   |       |       |       |       |       |       |        |        |        |
| neb30 wt sib   |       |       |       |       |       |       |       |        |        |        | neb30 mut                                            |       |       |       |       |       |       |        |        |        |
|                | 8.62  | 8.28  | 7.24  | 6.90  | 6.77  | 6.30  | 5.84  | 5.62   | 4.94   | 5.64   | 19.27                                                | 18.95 | 18.55 | 17.76 | 17.49 | 16.66 | 16.41 | 15.73  | 16.40  | 16.92  |
|                | 38.12 | 38.13 | 38.30 | 37.57 | 34.54 | 32.42 | 31.58 | 31.66  | 34.53  | 35.33  | 14.46                                                | 15.06 | 14.71 | 14.97 | 14.89 | 12.71 | 12.11 | 12.19  | 13.11  | 13.68  |
|                | 34.19 | 34.66 | 34.96 | 35.75 | 33.50 | 31.73 | 35.13 | 37.08  | 39.06  | 42.70  | 7.44                                                 | 7.10  | 7.20  | 7.03  | 7.03  | 6.88  | 6.77  | 6.71   | 8.19   | 9.44   |
|                | 11.18 | 10.47 | 10.25 | 10.12 | 9.37  | 9.17  | 9.78  | 10.95  | 12.68  | 14.32  | 10.30                                                | 10.53 | 9.81  | 10.04 | 9.44  | 9.57  | 9.88  | 10.51  | 13.11  | 14.25  |
|                | 44.11 | 42.38 | 41.09 | 39.14 | 37.80 | 36.99 | 37.52 | 40.50  | 43.39  | 45.86  | 31.01                                                | 29.76 | 27.17 | 24.63 | 21.61 | 22.75 | 23.71 | 25.61  | 27.70  | 25.53  |
| n              | 5     | 5     | 5     | 5     | 5     | 5     | 5     | 5      | 5      | 5      | 21.77                                                | 23.20 | 23.00 | 22.38 | 21.41 | 20.64 | 21.16 | 21.12  | 24.63  | 25.51  |
| Mean           | 27.24 | 26.78 | 26.37 | 25.89 | 24.40 | 23.32 | 23.93 | 25.16  | 26.92  | 28.77  | 6                                                    | 6     | 6     | 6     | 6     | 6     | 6     | 6      | 6      | 6      |
| SEM            | 16.25 | 16.15 | 16.27 | 15.96 | 15.01 | 14.41 | 15.03 | 15.84  | 17.04  | 17.84  | 17.38                                                | 17.43 | 16.74 | 16.13 | 15.31 | 14.87 | 15.01 | 15.31  | 17.19  | 17.55  |
| SD             | 7.27  | 7.22  | 7.28  | 7.14  | 6.71  | 6.44  | 6.72  | 7.08   | 7.62   | 7.98   | 8.56                                                 | 8.34  | 7.67  | 6.86  | 6.08  | 6.25  | 6.61  | 7.02   | 7.49   | 6.62   |
|                |       |       |       |       |       |       |       |        |        |        | percentage force at 200 Hz (compared to wt siblings) |       |       |       |       |       |       |        |        |        |
|                |       |       |       |       |       |       |       |        |        |        | 61                                                   |       |       |       |       |       |       |        |        |        |

Supplemental Table 4. Force production measurements at optimal sarcomere length (recorded values and descriptive statistics)
