# Supplementary material for: Comprehensive phenotypic characterization of an allelic series of zebrafish models of NEB-related nemaline myopathy
Source: PubMed Central journal article supplement (PMC11153343; doi:10.1093/hmg/ddae033), 2024-03-17
Supplement: supplemental_table_5_ddae033.pdf [file supplemental_table_5_ddae033.pdf]

|                            |                | neb <sup>15</sup> |        | neb <sup>11</sup> |       | neb <sup>hu28</sup> |        | neb <sup>34</sup> |        | neb <sup>21</sup> |        | neb <sup>30</sup> |        |
|----------------------------|----------------|-------------------|--------|-------------------|-------|---------------------|--------|-------------------|--------|-------------------|--------|-------------------|--------|
|                            |                | wt                | mut    | wt                | mut   | wt                  | mut    | wt                | mut    | wt                | mut    | wt                | mut    |
| <b>Activation Kinetics</b> | <b>Slack</b>   |                   |        |                   |       |                     |        |                   |        |                   |        |                   |        |
|                            |                | 5                 | 5      | 4.5               | 4.5   | 5.5                 | 5.5    | 6                 | 5.5    | 8                 | 7      | 4.5               | 5.5    |
|                            |                | 5.5               | 3.5    | 5.5               | 5.5   | 4.5                 | 3.5    | 6                 | 5.5    | 8                 | 6      | 5.5               | 6.5    |
|                            |                | 5.5               | 6      | 5.5               | 4.5   | 5                   | 1.5    | 6                 | 6      | 6.5               |        | 5.5               | 5.5    |
|                            |                | 5.5               | 3.5    |                   | 4.5   | 4.5                 | 6.5    | 5.5               | 4.5    | 6                 |        | 6.5               | 6.5    |
|                            |                | 5.5               | 6      |                   |       | 4.5                 |        | 6                 |        |                   |        | 5.5               | 7      |
|                            |                |                   | 7.5    |                   |       | 7                   |        |                   |        |                   |        |                   |        |
|                            |                |                   | 6.5    |                   |       |                     |        |                   |        |                   |        |                   |        |
|                            | <b>n</b>       | 5                 | 7      | 3                 | 4     | 6                   | 4      | 5                 | 4      | 4                 | 2      | 5                 | 5      |
|                            | <b>Mean</b>    | 5.4               | 5.429  | 5.167             | 4.75  | 5.167               | 4.25   | 5.9               | 5.375  | 7.125             | 6.5    | 5.5               | 6.2    |
|                            | <b>SEM</b>     | 0.1               | 0.5714 | 0.3333            | 0.25  | 0.4014              | 1.109  | 0.1               | 0.3146 | 0.5154            | 0.5    | 0.3162            | 0.3    |
| <b>Activation Kinetics</b> | <b>Optimal</b> |                   |        |                   |       |                     |        |                   |        |                   |        |                   |        |
|                            |                | 5.5               | 6      | 5.5               | 4.5   | 6.5                 | 4.5    | 6                 | 6.5    | 8                 | 7      | 5.5               | 6.5    |
|                            |                | 5.5               | 3.5    | 7.5               | 2.5   | 6                   | 7      | 6.5               | 6.5    | 5                 | 9      | 6.5               | 6.5    |
|                            |                | 5.5               | 5.5    | 6.5               | 4.5   | 6.5                 | 6.5    | 6                 | 6      | 7.5               | 8      | 6.5               | 5.5    |
|                            |                | 5.5               | 3.5    |                   | 4.5   | 5.5                 | 7      | 6                 | 5.5    | 7.5               |        | 6.5               | 6.5    |
|                            |                | 5.5               | 5      |                   |       | 6.5                 | 5.5    |                   |        |                   |        | 7.5               | 6.5    |
|                            |                |                   | 4.5    |                   |       | 6.5                 | 6      |                   |        |                   |        |                   | 6.5    |
|                            |                |                   | 6      |                   |       | 7                   | 8      |                   |        |                   |        |                   |        |
|                            |                |                   |        |                   |       | 5.5                 | 4.5    |                   |        |                   |        |                   |        |
|                            |                |                   |        |                   |       | 6                   | 6      |                   |        |                   |        |                   |        |
|                            |                |                   |        |                   |       | 6.5                 | 5.5    |                   |        |                   |        |                   |        |
|                            |                |                   |        |                   |       | 5                   | 4.5    |                   |        |                   |        |                   |        |
|                            |                |                   |        |                   |       | 6.5                 |        |                   |        |                   |        |                   |        |
|                            | <b>n</b>       | 5                 | 7      | 3                 | 4     | 12                  | 11     | 4                 | 4      | 4                 | 3      | 5                 | 6      |
|                            | <b>Mean</b>    | 5.5               | 4.857  | 6.5               | 4     | 6.167               | 5.909  | 6.125             | 6.125  | 7                 | 8      | 6.5               | 6.333  |
|                            | <b>SEM</b>     | 0                 | 0.4041 | 0.5774            | 0.5   | 0.1667              | 0.3491 | 0.125             | 0.2394 | 0.677             | 0.5774 | 0.3162            | 0.1667 |
| <b>Relaxation Kinetics</b> | <b>Slack</b>   |                   |        |                   |       |                     |        |                   |        |                   |        |                   |        |
|                            |                | 6.5               | 13     | 9                 | 9     | 8                   | 13     | 10                | 11     | 10                | 26     | 7.5               | 12     |
|                            |                | 9                 | 10.5   | 13                | 15    | 10.5                | 8      | 9                 | 13     | 20                | 24     | 12                | 10     |
|                            |                | 9                 | 11.5   | 10                | 10    | 9                   | 8.5    | 11                | 11     | 13                |        | 11                | 9      |
|                            |                | 8                 | 12.5   |                   | 10    | 8                   | 10     | 10                | 12     | 10                |        | 9                 | 12     |
|                            |                | 11                | 9.5    |                   |       | 8                   |        | 8                 |        |                   |        | 13                | 12     |
|                            |                |                   | 8      |                   |       | 10                  |        |                   |        |                   |        |                   |        |
|                            |                |                   | 6.5    |                   |       |                     |        |                   |        |                   |        |                   |        |
|                            | <b>n</b>       | 5                 | 7      | 3                 | 4     | 6                   | 4      | 5                 | 4      | 4                 | 2      | 5                 | 5      |
|                            | <b>Mean</b>    | 8.7               | 10.21  | 10.67             | 11    | 8.917               | 9.875  | 9.6               | 11.75  | 13.25             | 25     | 10.5              | 11     |
|                            | <b>SEM</b>     | 0.7348            | 0.8988 | 1.202             | 1.354 | 0.4549              | 1.125  | 0.5099            | 0.4787 | 2.358             | 1      | 1                 | 0.6325 |
| <b>Relaxation Kinetics</b> | <b>Optimal</b> |                   |        |                   |       |                     |        |                   |        |                   |        |                   |        |
|                            |                | 11                | 16     | 11                | 13    | 19                  | 19     | 14                | 21     | 13                | 35     | 11                | 27     |
|                            |                | 12                | 16.5   | 25                | 17    | 14                  | 17     | 17                | 13     | 35                | 37     | 16                | 14     |
|                            |                | 14                | 16     | 14                | 29    | 27                  | 9      | 14                | 13     | 19                | 55     | 17                | 12     |
|                            |                | 12.5              | 17     |                   | 20    | 15                  | 21     | 9                 | 12     | 20                |        | 21                | 13     |
|                            |                | 14                | 11     |                   |       | 12                  | 17     |                   |        |                   |        | 19                | 16     |
|                            |                |                   | 9      |                   |       | 11                  | 18     |                   |        |                   |        |                   | 12     |
|                            |                |                   | 11     |                   |       | 11                  | 13     |                   |        |                   |        |                   |        |
|                            |                |                   |        |                   |       | 12                  | 14     |                   |        |                   |        |                   |        |
|                            |                |                   |        |                   |       | 13                  | 10.5   |                   |        |                   |        |                   |        |
|                            |                |                   |        |                   |       | 11                  | 9.5    |                   |        |                   |        |                   |        |
|                            |                |                   |        |                   |       | 11                  | 15     |                   |        |                   |        |                   |        |
|                            |                |                   |        |                   |       | 17                  |        |                   |        |                   |        |                   |        |
|                            | <b>n</b>       | 5                 | 7      | 3                 | 4     | 12                  | 11     | 4                 | 4      | 4                 | 3      | 5                 | 6      |
|                            | <b>Mean</b>    | 12.7              | 13.79  | 16.67             | 19.75 | 14.42               | 14.82  | 13.5              | 14.75  | 21.75             | 42.33  | 16.8              | 15.67  |
|                            | <b>SEM</b>     | 0.5831            | 1.253  | 4.256             | 3.4   | 1.368               | 1.207  | 1.658             | 2.097  | 4.679             | 6.36   | 1.685             | 2.348  |

**Supplemental Table 5.** Activation and relaxation kinetics (measurements and descriptive statistics)
