# Supplementary material for: Comprehensive phenotypic characterization of an allelic series of zebrafish models of NEB-related nemaline myopathy
Source: PubMed Central journal article supplement (PMC11153343; doi:10.1093/hmg/ddae033), 2024-03-17
Supplement: supplemental_table_6_ddae033.pdf [file supplemental_table_6_ddae033.pdf]

| zebrafish line           | neb <sup>15</sup> |          |          | neb <sup>11</sup> |         |          | neb <sup>hu28</sup> |          |          | neb <sup>34</sup> |          |          | neb <sup>21</sup> |          |          | neb <sup>30</sup> |          |          |
|--------------------------|-------------------|----------|----------|-------------------|---------|----------|---------------------|----------|----------|-------------------|----------|----------|-------------------|----------|----------|-------------------|----------|----------|
|                          | wt                | het      | mut      | wt                | het     | mut      | wt                  | het      | mut      | wt                | het      | mut      | wt                | het      | mut      | wt                | het      | mut      |
| <b>n</b>                 | 607               | 620      | 721      | 664               | 473     | 493      | 346                 | 528      | 301      | 161               | 136      | 330      | 1262              | 793      | 625      | 549               | 149      | 117      |
| <b>mean</b>              | 0.8075            | 0.8341   | 0.7588   | 0.8388            | 0.8529  | 0.7645   | 0.8192              | 0.8166   | 0.6928   | 0.8239            | 0.8308   | 0.7213   | 0.8301            | 0.8112   | 0.7816   | 0.8538            | 0.8161   | 0.8235   |
| <b>SEM</b>               | 0.002098          | 0.002382 | 0.002455 | 0.002033          | 0.00324 | 0.00274  | 0.002791            | 0.002774 | 0.005091 | 0.004105          | 0.003927 | 0.003967 | 0.00121           | 0.001855 | 0.002274 | 0.002222          | 0.004387 | 0.006603 |
| <b>Slope</b>             | 0.2706            | 0.3963   | 0.3189   | 0.269             | 0.4591  | 0.4261   | 0.2534              | 0.2433   | 0.4253   | 0.1926            | 0.1804   | 0.157    | 0.3358            | 0.3692   | 0.3331   | 0.3216            | 0.2981   | 0.4167   |
| <b>Y-intercept</b>       | 0.2642            | 0.01876  | 0.1181   | 0.2847            | -0.1011 | -0.07247 | 0.304               | 0.3125   | -0.134   | 0.4256            | 0.4624   | 0.4105   | 0.1438            | 0.07117  | 0.1206   | 0.1811            | 0.2091   | -0.03382 |
| <b>X-intercept</b>       | -0.9766           | -0.04734 | -0.3704  | -1.059            | 0.2203  | 0.1701   | -1.2                | -1.284   | 0.3152   | -2.21             | -2.563   | -2.615   | -0.4281           | -0.1928  | -0.3622  | -0.5632           | -0.7013  | 0.08114  |
| <b>1/slope</b>           | 3.696             | 2.524    | 3.136    | 3.717             | 2.178   | 2.347    | 3.946               | 4.11     | 2.351    | 5.193             | 5.543    | 6.37     | 2.978             | 2.709    | 3.002    | 3.11              | 3.355    | 2.4      |
| <b>Slope SE</b>          | 0.02136           | 0.02533  | 0.02316  | 0.01654           | 0.02759 | 0.01839  | 0.0219              | 0.02552  | 0.03393  | 0.05614           | 0.03545  | 0.0168   | 0.01278           | 0.0214   | 0.02433  | 0.02353           | 0.044    | 0.06117  |
| <b>Y-intercept SE</b>    | 0.04295           | 0.05216  | 0.04657  | 0.0342            | 0.05723 | 0.03568  | 0.04513             | 0.05284  | 0.0638   | 0.1162            | 0.07276  | 0.03397  | 0.02613           | 0.04293  | 0.04828  | 0.04931           | 0.08947  | 0.1258   |
| <b>percentage length</b> |                   |          | 94       |                   |         | 91       |                     |          | 85       |                   |          | 88       |                   |          | 94       |                   |          | 96       |

**Supplemental Table 6.** Thin filament length (descriptive statistics)
