# Supplementary material for: Comprehensive phenotypic characterization of an allelic series of zebrafish models of NEB-related nemaline myopathy
Source: PubMed Central journal article supplement (PMC11153343; doi:10.1093/hmg/ddae033), 2024-03-17
Supplement: supplemental_table_7_ddae033.pdf [file supplemental_table_7_ddae033.pdf]

| logFC          | <i>neb</i> <sup>15</sup> | <i>neb</i> <sup>11</sup> | <i>neb</i> <sup>hu28</sup> | <i>neb</i> <sup>34</sup> | <i>neb</i> <sup>21</sup> | <i>neb</i> <sup>30</sup> |
|----------------|--------------------------|--------------------------|----------------------------|--------------------------|--------------------------|--------------------------|
| <b>neb</b>     | -3.358                   | -3.439                   | -4.372                     | 0.210                    | 0.707                    | -0.048                   |
| <b>acta1b</b>  | -1.934                   | -2.474                   | -3.109                     | -1.490                   | -2.047                   | -0.681                   |
| <b>klhl38b</b> | -0.036                   | -0.036                   | -2.779                     | -0.735                   | -0.281                   | -1.391                   |
| <b>ankrd1b</b> | 0.296                    | -0.488                   | -2.659                     | 0.083                    | 0.203                    | 0.032                    |
| <b>actc1b</b>  | -0.899                   | -1.228                   | -2.162                     | -0.929                   | -1.198                   | -0.594                   |
| <b>acta1a</b>  | -1.499                   | -1.584                   | -1.730                     | -1.527                   | 0.275                    | -0.307                   |
| <b>tnnt1</b>   | -0.707                   | -0.638                   | -1.340                     | -0.623                   | 0.053                    | 0.524                    |
| <b>tpma</b>    | -0.071                   | -0.329                   | -1.230                     | -0.353                   | -0.304                   | -0.009                   |
| <b>lmod3</b>   | 0.174                    | -0.164                   | -0.488                     | -0.461                   | -0.037                   | 0.049                    |
| <b>cfl2</b>    | 0.237                    | -0.154                   | -0.440                     | -0.290                   | -0.275                   | -0.042                   |
| <b>tpm2</b>    | -0.530                   | -0.508                   | -0.388                     | -0.181                   | -0.154                   | 0.093                    |
| <b>klhl41b</b> | 0.258                    | -0.015                   | -0.360                     | -0.300                   | -0.206                   | 0.020                    |
| <b>kbtbd13</b> | -0.410                   | -0.194                   | -0.301                     | -0.127                   |                          | 0.541                    |
| <b>tpm3</b>    | -0.392                   | -0.367                   | -0.038                     | -0.064                   | -0.099                   | -0.039                   |
| <b>klhl40a</b> | 0.669                    | 0.193                    | 0.201                      | -0.100                   | -0.176                   | 0.328                    |
| <b>klhl41a</b> | 0.172                    | 0.131                    | 0.663                      | 0.247                    | -1.191                   | -0.226                   |
| <b>klhl40b</b> | 1.193                    | 0.111                    | 1.292                      | 0.059                    | 0.124                    | 0.340                    |
| <b>tmod1</b>   | -0.409                   | -0.640                   | 1.493                      | -0.271                   | -0.951                   | 0.107                    |

**Supplemental Table 7.** Nematine myopathy genes
