# Supplementary material for: Comprehensive phenotypic characterization of an allelic series of zebrafish models of NEB-related nemaline myopathy
Source: PubMed Central journal article supplement (PMC11153343; doi:10.1093/hmg/ddae033), 2024-03-17
Supplement: supplemental_table_8_ddae033.pdf [file supplemental_table_8_ddae033.pdf]

| logFC      | neb <sup>15</sup> | neb <sup>11</sup> | neb <sup>huz8</sup> | neb <sup>34</sup> | neb <sup>21</sup> | neb <sup>30</sup> |
|------------|-------------------|-------------------|---------------------|-------------------|-------------------|-------------------|
| acta2      | -1.006            | -0.297            | -1.169              | -0.798            | -0.158            | -0.392            |
| actb1      | -0.170            | 0.052             | 0.502               | 0.142             | -0.076            | 0.000             |
| actc1a     | -0.424            | -0.576            | -0.655              | -0.381            | -0.148            | 0.088             |
| actc1c     | -4.660            | -4.045            | -2.981              | -2.327            | -0.565            | -0.526            |
| actn3a     | 0.132             | -0.123            | -0.874              | -0.118            | -0.086            | 0.198             |
| atp2a2a    | -1.849            | -1.659            | -0.996              | -0.685            | -0.333            | -0.849            |
| capza1a    | -0.019            | 0.173             | 0.592               | 0.070             | 0.401             | -0.004            |
| capza1b    | -0.277            | -0.485            | -0.752              | -0.510            | -0.461            | -0.091            |
| capza1b    | -0.277            | -0.485            | -0.752              | -0.510            | -0.461            | -0.091            |
| capzb      | -0.390            | -0.496            | -0.423              | -0.365            | -0.775            | -0.056            |
| desmb      | -1.506            | -0.510            | -1.688              | -1.162            | -0.987            | -0.386            |
| jph1b      | -0.167            | -0.179            | -0.762              | -0.158            | -0.242            | 0.111             |
| kbtbd12    | 0.101             | 0.061             | -0.691              | -0.234            | -0.181            | -0.001            |
| khih31     | -0.523            | -0.494            | -1.264              | -0.962            | -0.765            | -0.339            |
| lmod1a     | 0.496             | 0.198             | -0.256              | -0.506            | 0.166             | -0.266            |
| lmod1b     | 0.195             | -0.256            | -0.410              | 0.047             | 1.056             | 1.142             |
| lmod2b     | 0.071             | 0.542             | -0.587              | -0.418            | 0.204             | 0.068             |
| mustn1a    | -0.319            | -0.330            | -0.888              | -0.299            | -0.295            | 0.053             |
| mustn1b    | 3.043             | 1.950             | 1.360               | 1.175             | 2.238             | 1.554             |
| mybpc1     | -0.304            | -0.432            | -1.204              | -0.167            | 0.155             | 0.384             |
| mybpbh     | 0.064             | -0.278            | -1.107              | -0.269            | -0.281            | -0.007            |
| myh11a     | -1.111            | -0.448            | -0.909              | -0.421            | -0.605            | -0.167            |
| myh7       | 0.104             | 0.057             | -0.656              | -0.029            | -0.207            | 0.066             |
| myha       | 0.338             | -0.857            | -2.055              | -1.225            | -0.164            | -0.165            |
| myhc4      | -0.226            | -1.313            | -1.263              | -1.220            | -1.160            | -0.704            |
| myhz1.1    | -0.069            | -0.465            | -1.321              | -0.422            | -0.354            | 1.462             |
| myhz1.2    | -0.275            | -0.725            | -1.238              | -0.340            | -0.521            | 0.013             |
| myhz1.3    | -0.552            | -1.112            | -2.482              | -0.903            | -1.220            | -0.429            |
| myhz2      | -0.373            | -1.262            | -1.748              | -0.798            | -0.931            | -0.783            |
| myl1       | 0.034             | -0.327            | -1.033              | -0.610            | -0.809            | -0.105            |
| myl12.1    | 0.040             | 0.179             | 0.811               | 0.173             | -0.059            | -0.125            |
| myl13      | -0.374            | -0.609            | -0.917              | -0.238            | 0.008             | -0.080            |
| mylk4a     | 0.580             | -0.068            | -0.703              | 0.236             | -1.269            | 0.291             |
| mylpta     | -0.078            | -0.667            | -1.688              | -0.356            | -0.484            | -0.120            |
| mylptb     | 0.147             | -0.204            | -1.290              | -0.119            | -0.312            | -0.067            |
| mylz3      | -0.218            | -0.734            | -1.764              | -0.464            | -0.369            | -0.109            |
| myo1b      | -0.995            | -0.368            | -0.845              | -0.091            | -0.763            | -0.025            |
| myo7bb     | -1.606            | -0.354            | -1.332              | -0.115            | -2.245            | -0.144            |
| myod1      | 1.218             | 0.440             | -0.869              | 0.646             | 0.439             | 0.481             |
| myom1a     | 0.127             | -0.213            | -0.695              | -0.200            | -0.125            | 0.142             |
| myom2a     | 0.105             | -0.152            | -0.717              | -0.247            | -0.187            | 0.084             |
| myoz1a     | -0.184            | -0.309            | -1.003              | -0.204            | -0.481            | 0.021             |
| myoz1b     | 0.413             | 0.160             | -0.854              | 0.005             | 0.107             | 0.249             |
| myoz2a     | 0.166             | 0.036             | -1.124              | -0.117            | 0.007             | 0.422             |
| paalid     | 0.057             | -0.062            | 0.073               | -0.492            | -0.201            | -0.302            |
| pblid2     | -0.732            | -0.845            | -1.313              | -0.642            | -0.673            | -0.271            |
| pvalb1     | 0.135             | -0.276            | -1.695              | -0.230            | 0.360             | 0.249             |
| pvalb2     | 0.128             | -0.272            | -1.478              | -0.282            | -0.199            | -0.012            |
| pvalb3     | -0.698            | -1.101            | -1.353              | -0.613            | -0.375            | -0.738            |
| pvalb4     | -0.529            | -0.631            | -1.634              | -0.379            | -0.082            | 0.043             |
| ryr3       | 0.142             | -0.213            | -1.016              | -0.263            | 0.136             | 0.287             |
| tmod2      | -0.110            | -0.192            | 0.912               | -0.064            | -0.287            | -0.156            |
| tmod4      | 0.284             | 0.130             | -0.934              | -0.013            | -0.068            | 0.048             |
| tnnc2      | -0.064            | -0.394            | -1.188              | -0.315            | -0.255            | 0.037             |
| tnni1b     | 0.429             | 0.330             | 0.670               | 0.455             | 0.552             | 0.773             |
| tnni1c     | -1.304            | -0.907            | -0.580              | -0.439            | -0.334            | -0.207            |
| tnni1d     | 0.423             | 0.412             | -1.254              | 0.561             | 0.000             | 0.583             |
| tnni2a.2   | -0.968            |                   | -1.217              | -1.052            |                   | 1.263             |
| tnni2a.3   | -0.839            |                   | -1.724              | -0.577            | 0.505             | 1.692             |
| tnni2a.4   | -0.029            | -0.364            | -1.180              | -0.377            | -0.312            | -0.063            |
| tnni2b.1   | 0.282             | 0.446             | 0.846               | 0.404             | 0.674             | 0.760             |
| tnni2b.2   | -0.053            | 0.557             | -0.380              | 0.076             | 0.492             | 0.196             |
| tnni4a     | 0.569             | 0.473             | 0.215               | 0.526             | -0.029            | 0.313             |
| tnni4b.1   | -3.747            | -1.566            | -3.437              | -1.294            | -0.287            | -1.114            |
| tnni4b.2   | -0.395            | -0.545            | -1.063              | -0.234            | 0.189             | -0.041            |
| tnnt2b     | 0.262             | 0.006             | -1.107              | 0.191             | -0.003            | 0.645             |
| tnnt2c     | 1.392             | 0.731             | 1.190               | 1.498             | -0.174            | 0.974             |
| tnnt2d     | -0.903            | -0.751            | -1.011              | -0.289            | -0.463            | -0.272            |
| tnnt2e     | 0.173             | -0.027            | 0.120               | 0.045             | 0.179             | 0.061             |
| tnnt3a     | -0.035            | -0.485            | -0.023              | -0.293            | 0.106             | 0.304             |
| tnnt3b     | -0.014            | -0.305            | -1.209              | -0.264            | -0.289            | 0.101             |
| tpm1       | -0.561            | -0.340            | -0.360              | -0.372            | -0.128            | 0.081             |
| tpm4a      | -0.215            | -0.303            | 0.501               | -0.018            | -0.312            | 0.402             |
| tpm4b      | 0.204             | -0.322            | 0.595               | 0.318             | -0.131            | 0.759             |
| trim109    | 0.378             | -0.329            | -0.534              | -0.391            | 0.410             | -0.076            |
| trim63a    | 0.018             | -0.105            | -1.818              | -0.894            | -0.241            | -1.271            |
| trim63b    | 0.527             | 0.087             | -1.333              | -0.524            | 0.469             | -0.511            |
| ttn.1      | 0.090             | -0.466            | -1.596              | 0.114             | -0.289            | 0.309             |
| ttn.2      | 0.170             | -0.462            | -1.530              | 0.174             | 0.261             | 0.348             |
| twf2a      | 0.729             | 0.373             | -1.126              | -0.105            | 0.086             | -0.309            |
| ucmab      | -1.643            | -0.781            | -1.165              | -1.201            | 0.641             | -1.539            |
| wasb       | 0.205             | -0.415            | -1.629              | -0.400            | 0.211             | -0.325            |
| xirp1      | 1.070             | 0.364             | 0.930               | 0.019             | 1.157             | 0.870             |
| xirp2a     | 0.439             | -0.093            | 0.485               | -0.020            | 0.203             | 0.526             |
| xirp2b     | -0.265            | -0.240            | 0.445               | -0.509            | -0.970            | 0.481             |
| zgc:153867 | 0.015             | 0.160             | 0.909               | 0.162             | 0.248             | 0.156             |
| zyx        | -0.717            | -0.172            | 1.389               | -0.311            | 0.015             | -0.677            |

Supplemental Table 8. Muscle relevant genes
